# Supplementary material for: Effects of ACE Mutations Associated with Alzheimer’s Disease on Blood ACE Phenotype
Source: Preprints.org preprint supplement (doi:10.20944/preprints202406.0599.v1), 2024-06-11
Supplement: Supplementary file 2 [file supplementary]

Table S2

| TableS1. ACE mutations                                    |                      | Total: 1234                             | Blood ACE: 62                  | 9/29/2023                     |                                           |                         |
|-----------------------------------------------------------|----------------------|-----------------------------------------|--------------------------------|-------------------------------|-------------------------------------------|-------------------------|
| #                                                         | Genetic position     | Amino acid position<br>(mature protein) | Polymorphism<br>or (reference) | PolyPhen-2<br>Score<br>(HVAR) | Minor Allele<br>Frequency,<br>per 100 000 | Blood<br>ACE,<br>% of M |
| <b>I. Damaging (elimination ?) of signal peptide (SP)</b> |                      |                                         |                                |                               |                                           |                         |
| 1                                                         | p.Met1Leu            | SP                                      | rs1262893315                   | 0.000                         | 0.7                                       |                         |
| 2                                                         | p.Met1Lys            | SP                                      | rs1005792910                   | 0.016                         | 0.7                                       |                         |
| 3                                                         | p.Met1Thr            | SP                                      |                                | 0.072                         |                                           |                         |
| 4                                                         | p.Gly2Arg            | SP                                      | rs2049627089                   | 0.546                         | 6.0                                       |                         |
| 5                                                         | p.Gly2Glu            | SP                                      | rs558593002                    | 0.009                         | 50                                        |                         |
| 6                                                         | p.Gly2Val            | SP                                      |                                | 0.055                         |                                           |                         |
| 7                                                         | p.Ser5GlyfsX136      | SP                                      | rs797045079; (1)               | 1.000                         | 0.4                                       | Low                     |
| 8                                                         | p.Ser5Leu            | SP                                      | rs1296229818                   | 0.263                         | 0.8                                       |                         |
| 9                                                         | p.Ser5Trp            | SP                                      |                                | 0.039                         |                                           |                         |
| 10                                                        | p.Gly6Ala            | SP                                      | rs1267076673                   | 0.079                         | 0.7                                       |                         |
| 11                                                        | p.Gly6Arg            | SP                                      | rs2049627437                   | 0.027                         | 0.8                                       |                         |
| 12                                                        | p.Arg7Ser            | SP                                      | rs1285068027                   | 0.001                         | 0.7                                       |                         |
| 13                                                        | p.Arg7Gly            | SP                                      |                                | 0.001                         |                                           |                         |
| 14                                                        | p.Arg7Leu            | SP                                      | rs1451926480                   | 0.001                         | 2.2                                       |                         |
| 15                                                        | p.Arg8GlyfsX134      | SP                                      | (2)                            | 1.000                         | 0.4                                       | Low                     |
| 16                                                        | p.Arg8Leu            | SP                                      | rs2049627704                   | 0.001                         | 1.5                                       |                         |
| 17                                                        | p.Arg8Trp            | SP                                      | rs1333116255                   | 0.001                         | 7.8                                       |                         |
| 18                                                        | p.Gly9Arg            | SP                                      | rs1320210312                   | 0.004                         | 0.8                                       |                         |
| 19                                                        | p.Gly9Trp            | SP                                      | rs1223694748                   | 0.008                         |                                           |                         |
| 20                                                        | p.Gly9Glu            | SP                                      |                                | 0.010                         | 3.0                                       |                         |
| 21                                                        | p.Gly11Arg           | SP                                      | rs1405957884                   | 0.000                         | 0.4                                       |                         |
| 22                                                        | p.Leu13Pro           | SP                                      | rs1187548350                   | 0.001                         | 96 <sup>a</sup>                           |                         |
| 23                                                        | p.Leu13 Leu14del     | SP                                      | rs900084108; (2)               | 1.000                         | 6.6                                       | Low                     |
| 24                                                        | p.Leu13 Leu16del     | SP                                      | rs751352152; (3)               | 1.000                         | 0.8                                       | Low                     |
| 25                                                        | p.Leu14Pro           | SP                                      | rs1207951348                   | 0.000                         | 0.4                                       |                         |
| 26                                                        | p.Leu14 Leu22del     | SP                                      | rs90879686                     | 1.000                         | 1.6                                       |                         |
| 27                                                        | p.Pro15 16PL(2)indel | SP                                      | rs522691783                    | 1.000                         | 10                                        |                         |
| 28                                                        | p.Pro15 Leu21del     | SP                                      | rs1245868974                   | 1.000                         | 0.8                                       |                         |
| 29                                                        | p.Pro15Ser           | SP                                      | rs1193133040                   | 0.001                         | 0.4                                       |                         |
| 30                                                        | p.Pro15Leu           | SP                                      | rs1355518990                   | 0.000                         | 1.4                                       |                         |
| 31                                                        | p.Pro15Gln           | SP                                      |                                | 0.000                         |                                           |                         |
| 32                                                        | p.Leu16 Pro23indel   | SP                                      | rs983649759; (2)               | 1.000                         | 19                                        | Low                     |
| 33                                                        | p.Leu16Pro           | SP                                      | rs1352305726                   | 0.000                         | 3.3                                       |                         |
| 34                                                        | p.Pro17Arg           | SP                                      | rs1441805434                   | 0.084                         | 0.9                                       |                         |
| 35                                                        | p.Pro17Ser           | SP                                      | rs1599136248                   | 0.001                         | 0.4                                       |                         |
| 36                                                        | p.Leu18 L20ins       | SP                                      | rs532691783; (4)               | 1.000                         | 6.0                                       | 86 (4)                  |
| 37                                                        | p.Leu19 Pro24ins     | SP                                      | rs1437482955                   | 1.000                         | 0.4                                       |                         |
| 38                                                        | p.Leu19Pro           | SP                                      | rs1157043147                   | 0.694                         | 13                                        |                         |
| 39                                                        | p.Leu20Serfs         | SP                                      | rs752411292                    | 1.000                         | 1.6                                       |                         |
| 40                                                        | p.Leu20Trp           | SP                                      | rs770640756                    | 0.624                         | 1.4                                       |                         |
| 41                                                        | p.Leu21Pro           | SP                                      | (2)                            | 0.797                         | 0.4                                       | Low                     |
| 42                                                        | p.Leu22Val           | SP                                      | rs2049629392                   | 0.068                         | 0.7                                       |                         |
| 43                                                        | p.Pro23Ser           | SP                                      | rs1288779128                   | 0.020                         | 0.0                                       |                         |
| 44                                                        | p.Pro23Ala           | SP                                      |                                | 0.001                         |                                           |                         |
| 45                                                        | p.Pro23Leu           | SP                                      | rs2049629518                   | 0.000                         | 0.4                                       |                         |
| 46                                                        | p.Pro24Thr           | SP                                      | rs2049629589                   | 0.006                         | 72 <sup>a</sup>                           |                         |
| 47                                                        | p.Pro24del           | SP                                      | rs1440772953                   | 1.000                         | 1.6                                       |                         |
| 48                                                        | p.Gln25X             | SP                                      | rs1237545952                   | 1.000                         | 1.6                                       |                         |
| 49                                                        | p.Gln25Leu           | SP                                      | rs968327653                    | 0.000                         | 3.3                                       |                         |

Table S2

[illegible]

Table S2

| #                                              | Genetic position  | Amino acid position<br>(mature protein) | Polymorphism<br>or ( <i>reference</i> ) | PolyPhen-2<br>Score<br>(HVAR) | Minor Allele<br>Frequency,<br>per 100 000 | Blood<br>ACE,<br>% of M |
|------------------------------------------------|-------------------|-----------------------------------------|-----------------------------------------|-------------------------------|-------------------------------------------|-------------------------|
| <b>II. Indels or stop codons in mature ACE</b> |                   |                                         |                                         |                               |                                           |                         |
| 1                                              | p.Leu34Profs      | L5Pfs                                   | rs1459096726                            |                               | 0.4                                       |                         |
| 2                                              | p.Gln51X          | Q22X                                    | rs1184203291                            |                               | 0.8                                       |                         |
| 3                                              | p.Ser52Glnfs      | S23Qfs                                  | rs1189819056                            |                               | 0.8                                       |                         |
| 4                                              | p.Gln59X          | Q30X                                    | rs868134438                             |                               | 0.8                                       |                         |
| 5                                              | p.Gln63X          | Q34X                                    | rs1278390159                            |                               | 0.8                                       |                         |
| 6                                              | p.Thr113Phefs     | T84Ffs                                  | rs1232118105                            |                               | 0.8                                       |                         |
| 7                                              | p.Glu116X         | Q87X                                    | rs747960753                             |                               | 1.3                                       |                         |
| 8                                              | p.Glu138X         | Q109X                                   | rs779422412                             |                               | 0.5                                       |                         |
| 9                                              | p.Arg149Leufs*54  | R120LfsX54                              | rs778759606; (2,5)                      | insTTAGC                      | 4.2                                       | Low                     |
| 10                                             | p.Tyr151del       | Y122del                                 | rs750908161                             |                               | 2.8                                       |                         |
| 11                                             | p.Ser179Serfs     | S150Sfs                                 | rs1441192851                            |                               | 0.4                                       |                         |
| 12                                             | p.Arg180X         | R151X                                   | rs779454500                             |                               | 0.8                                       |                         |
| 13                                             | p.Ser181Thrfs     | S152Tfs                                 | rs56397551                              |                               | 0.4                                       |                         |
| 14                                             | p.Trp189X         | W160X                                   | rs765401595                             |                               | 0.8                                       |                         |
| 15                                             | p.Glu190Argfs     | E161Rfs                                 | rs1402956277                            |                               | 0.4                                       |                         |
| 16                                             | p.Trp230X         | W201X                                   | rs757421466                             |                               | 1.6                                       |                         |
| 17                                             | p.Tyr244Profs     | Y215Pfs                                 | rs1214574142                            |                               | 3.2                                       |                         |
| 18                                             | p.Tyr251Phefs     | Y222Ffs                                 | rs1285331787                            |                               | 0.4                                       |                         |
| 19                                             | p.Arg265X         | R236X                                   | rs138873311; (2)                        |                               | 1.2                                       | Low                     |
| 20                                             | p.Tyr266X         | Y237X                                   | rs121912704; (6,7)                      |                               | 0.8                                       | Low (6)                 |
| 21                                             | p.Asp268Glyfs     | D239Gfs                                 | rs1462640798                            |                               | 0.4                                       |                         |
| 22                                             | p.Arg269ins       | R240Yins                                | rs769080277                             |                               | 0.4                                       |                         |
| 23                                             | p.Arg274GlyfsX117 | R245Gfs                                 | (8)                                     |                               | 0.4                                       | Low                     |
| 24                                             | p.Met285Valfs     | M256Vfs                                 | rs769816155                             |                               | 0.4                                       |                         |
| 25                                             | p.Phe300Serfs     | F271Sfs                                 | rs1387186484                            |                               | 0.4                                       |                         |
| 26                                             | p.Glu315X         | E286X                                   | rs760913528                             |                               | 0.4                                       |                         |
| 27                                             | p.Trp317X         | W288X                                   | rs1414333467                            |                               | 0.8                                       |                         |
| 28                                             | p.Ala326Glufs     | A297Efs                                 | rs1474671878                            |                               | 1.6                                       |                         |
| 29                                             | p.Glu328del       | E299del                                 | (2)                                     |                               | 0.4                                       | Low                     |
| 30                                             | p.Met338Profs     | M309Pfs                                 | rs1196439789                            |                               | 0.4                                       |                         |
| 31                                             | p.Trp343X         | W314X                                   | rs200225958; (2,5)                      |                               | 0.8                                       | Low                     |
| 32                                             | p.Ser346GluX47    | S317Efs                                 | rs1331062614; (2)                       |                               | 0.4                                       | Low                     |
| 33                                             | p. Val358del      | V329del                                 | rs770842341                             |                               | 0.4                                       |                         |
| 34                                             | p.Cys359Valfs     | C330Vfs                                 | rs774181017                             |                               | 0.4                                       |                         |
| 35                                             | p.Gln396X         | Q367X                                   | rs76906391                              |                               | 0.4                                       |                         |
| 36                                             | p.Ala412Glyfs     | A383Gfs                                 | rs759192800                             |                               | 0.8                                       |                         |
| 37                                             | p.Glu432Profs     | E403Pfs                                 | rs1388420671                            |                               | 0.8                                       |                         |
| 38                                             | p.Lys436X         | K407X                                   | rs1427700343                            |                               | 1.0                                       |                         |
| 39                                             | p.Leu440ProfsX15  | L411Pfs                                 | rs387906576; (6)                        |                               | 0.4                                       | Low                     |
| 40                                             | p.Asp441fs        | D412fs                                  | (5)                                     |                               | 0.4                                       |                         |
| 41                                             | p.Arg442Valfs     | R413Vfs                                 | rs1442562714                            |                               | 0.4                                       |                         |
| 42                                             | p.Leu454X         | L425X                                   | rs1404415405                            |                               | 0.8                                       |                         |
| 43                                             | p.Ile462Asnfs     | I433Nfs                                 | rs140992429                             |                               | 0.8                                       |                         |
| 44                                             | p.Phe464Alafs     | F435Afs                                 | rs753436653                             |                               | 0.8                                       |                         |
| 45                                             | p.Trp474X         | W445X                                   | rs762742726                             |                               | 0.8                                       |                         |
| 46                                             | p.Val478Valfs     | V449fs                                  | rs1246593224                            |                               | 0.4                                       |                         |
| 47                                             | p.Pro485Leufs     | P456fs                                  | (9)                                     |                               | 0.4                                       | Low                     |
| 48                                             | p.Ser486Profs     | S457Pfs                                 | rs758933315                             |                               | 2.4                                       |                         |
| 49                                             | p.Asp491Glufs     | D462Efs                                 | rs1257147672                            |                               | 0.4                                       |                         |
| 50                                             | p.Trp492X         | W463X                                   | rs1446625916                            |                               | 5.6                                       |                         |
| 51                                             | p.Arg496X         | R467X                                   | rs397514688; (2)                        |                               | 0.4                                       | Low                     |

Table S2

|     |                      |                      |                   |  |           |               |
|-----|----------------------|----------------------|-------------------|--|-----------|---------------|
| 52  | p.Gln500X            | Q471X                | rs2049747561      |  | 0.7       |               |
| 53  | p.Gln500Argfs        | Q471Rfs              | rs748348196       |  | 2.4       |               |
| 54  | p.Pro505Del          | P576del              | rs766909364       |  | 7.6       |               |
| 55  | p.Arg508X            | <b>R479X</b>         | rs367797185; (2)  |  | 3.2       | Low           |
| 56  | c.1709+5G>T          | <b>Abn. splicing</b> | (2)               |  | 0.4       | Low           |
| 57  | p.Gln537X            | Q508X                | rs1460738029      |  | 0.4       |               |
| 58  | p.537 538QF(3)       | Q508 F509ins         | rs771053807       |  | 0.8       |               |
| 59  | p.Glu539X            | E510X                | rs1474365721      |  | 0.4       |               |
| 60  | p.Glu547X            | E518X                | rs1319348585      |  | 0.4       |               |
| 61  | p.Trp581X            | W552X                | rs768467806       |  | 0.4       |               |
| 62  | p.Trp581Glyfs        | <b>W552Gfs</b>       | (2)               |  | 0.4       | Low           |
| 63  | p.Gln597X            | Q568X                | rs2029862662      |  | 0.4       |               |
| 64  | p.Lys601AsnfsX40     | <b>K572Nfs</b>       | (2,10)            |  | 0.8       | Low (2)       |
| 65  | p.Trp609X            | W580X                | rs769466912       |  | 0.4       |               |
| 66  | p.Glu613X            | E584X                | rs935167896       |  | 3.0       |               |
| 67  | p.Gln616X            | Q587X                | rs762769560       |  | 0.4       |               |
| 68  | p.Gly622Alafs        | G593Afs              | rs772014965       |  | <b>26</b> |               |
| 69  | p.Trp628X            | W599X                | rs745879536       |  | 0.4       |               |
| 70  | p.Glu655X            | E526X                | rs1371611657      |  | 0.8       |               |
| 71  | p.Trp664X            | W635X                | rs1419177611      |  | 0.4       |               |
| 72  | p.Trp672X            | <b>W643X</b>         | (11)              |  |           | Low           |
| 73  | p.Gln692X            | Q663X                | rs1260448350      |  | 0.4       |               |
| 74  | p.Tyr700X            | Y671X                | rs780199864       |  | 2.0       |               |
| 75  | p.Ile717Glnfs        | <b>I688Qfs</b>       | rs1219522144; (2) |  | 0.8       | Low           |
| 76  | p.Ile721LysfsX60     | <b>I692Lfs</b>       | (2)               |  | 0.4       | Low           |
| 77  | p.Gln735X            | Q706X                | rs933390771       |  | 0.8       |               |
| 78  | p.Leu744Cysfs        | L715Cfs              | rs745767649       |  | 1.6       |               |
| 79  | p.Val756Argfs        | V727Rfs              | rs772172179       |  | 0.4       |               |
| 80  | p.Leu784Tyrfs        | L755Yfs              | rs1476011360      |  | 0.8       |               |
| 81  | p.Trp787X            | W758X                | rs775934699       |  | 0.8       |               |
| 82  | p.Glu788Argfs        | E759Rfs              | rs1482032796      |  | 0.8       |               |
| 83  | p.Arg791X            | <b>R762X</b>         | (2,10)            |  | 0.4       | Low (2)       |
| 84  | p.Gln800X            | Q771X                | rs1568043111      |  | 0.4       |               |
| 85  | p.Tyr805X            | <b>Y776X</b>         | rs761458810       |  | 0.4       | 49 (personal) |
| 86  | p.Asp820Metfs        | D791Mfs              | rs757544710       |  | 0.8       |               |
| 87  | p.Trp825X            | W796X                | rs2030184791      |  | 0.4       |               |
| 88  | p.Arg826Serfs        | R797Sfs              | rs1441728993      |  | 0.4       |               |
| 89  | p.Gln836X            | Q807X                | rs1405858837      |  | 1.2       |               |
| 90  | p.Gln843Argfs        | Q814Rfs              | rs956900465       |  | 0.4       |               |
| 91  | p.Gln867X            | Q838X                | rs1413766379      |  | 0.4       |               |
| 92  | p.Asn882Serfs        | N853Sfs              | rs146430617       |  | 0.4       |               |
| 93  | p.Tyr892X            | Y863X                | rs762809850       |  | 0.4       |               |
| 94  | p.Pro897fs           | <b>P868fs</b>        | (12)              |  | 0.4       | Low           |
| 95  | p.Trp941X            | W912X                | rs2030363266      |  | 0.8       |               |
| 96  | p.Ser944Glnfs        | S915Qfs              | rs1221050110      |  | 0.4       |               |
| 97  | p.Lys948 Pro949del   | K919 P920del         | rs1292471704      |  | 0.4       |               |
| 98  | p.Glu954Glyfs        | E925Gfs              | rs78007237904     |  | 0.4       |               |
| 99  | p.Gln994X            | Q965X                | rs2030522022      |  | 0.7       |               |
| 100 | p.Pro1003 Ala1010del | P974 A981del         | rs746977732       |  | 0.4       |               |
| 101 | p.Leu1024fs          | <b>L995fs</b>        | (5)               |  | 0.4       | Low           |
| 102 | p.Ser1027Tyrfs       | S998Wfs              | rs1170915014      |  | 3.2       |               |
| 103 | p.Leu1032fs          | <b>L1003fs</b>       | (12)              |  | 0.4       | Low           |
| 104 | p.Glu1041 Ser1044del | Q1012del             | rs768525377       |  | 0.8       |               |
| 105 | p.Asp1058Tyrfs       | <b>D1029Yfs</b>      | (5)               |  | 0.4       | Low           |
| 106 | p.Pro1064Serfs       | P1035Sfs             | rs747724861       |  | 1.6       |               |

Table S2

|                                                               |                     |                     |                    |  |       |         |
|---------------------------------------------------------------|---------------------|---------------------|--------------------|--|-------|---------|
| 107                                                           | p.Trp1072X          | W1053X              | rs773163752        |  | 0.8   |         |
| 108                                                           | p.Trp1074X          | W1055X              | rs1266895232       |  | 0.8   |         |
| 109                                                           | p.Trp1091X          | W1062X              | rs1411245193       |  | 0.4   |         |
| 110                                                           | p. Gln1098X         | Q1069X              | rs1568047250       |  | 0.4   |         |
| 111                                                           | p.Val1104fs         | P1075SPfs           | rs1447215842       |  | 0.4   |         |
| 112                                                           | p.Val1130GlnDel     | V1101Qfs            | rs772585024        |  | 0.8   |         |
| 113                                                           | p.Val1130Metfs      | V1101Mfs            | rs762468887        |  | 2.4   |         |
| 114                                                           | p.Ser1131Profs      | S1102Pfs            | rs775933853        |  | 2.4   |         |
| 115                                                           | p.Gln1137X          | Q1108X              | rs1341633213       |  | 0.4   |         |
| 116                                                           | p.Gln1144X          | Q1115X              | rs1386775881       |  | 0.4   |         |
| 117                                                           | p.Asp1156fs         | D1127Rfs            | rs1403340480       |  | 0.4   |         |
| 118                                                           | p.Tyr1158X          | Y1129X              | rs1381445771       |  | 0.4   |         |
| 119                                                           | p.Tyr1158fs         | Y1129Ifs            | rs1367062284       |  | 0.8   |         |
| 120                                                           | p.Lys1161fs         | K1132Qfs            | rs34743858         |  | 0.4   |         |
| 121                                                           | p.Gln1165X          | Q1136X              | (2,10)             |  | 0.4   | Low (2) |
| 122                                                           | p.Lys1172 Met1183de | K1143_M1154del      | (1)                |  | 0.4   | Low     |
| 123                                                           | c.3503+1G>A         | Abn. splicing       | (2)                |  | 0.4   | Low     |
| 124                                                           | c.3691+1G>A         | Abn. splicing       | (13)               |  | 4.4   | 1133    |
| 125                                                           | p.Gly1174AlfsX12    | G1145Afs            | rs754265941;(2,8)  |  | 47    | Low     |
| 126                                                           | p.Trp1179X          | W1150X              | rs1406482731       |  | 0.4   |         |
| 127                                                           | p.Gln1184X          | Q1155X              | rs20307701130      |  | 0.4   |         |
| 128                                                           | p.Glu1217X          | E1188X              | rs534095139        |  | 0.8   |         |
| 129                                                           | p.Trp1226X          | W1197X <sup>b</sup> | rs769710002; (14)  |  | 0.4   | 1300    |
| 130                                                           | p.Ser1238Pfs        | S1209Pfs            | (5)                |  | 0.4   | Low     |
| 131                                                           | p.1248 1249LD(3)    | L1252_D1253ins      | rs780845846        |  | 0.4   |         |
| 132                                                           | p.Gln1253X          | Q1224X <sup>b</sup> | rs1174820268; (15) |  | 0.4   | 1200    |
| 133                                                           | p.Leu1276Ser1277del | L1247_S1248del      | rs1367232864       |  | 0.6   |         |
| 134                                                           | p.Gln1296X          | Q1267X              | rs1162756119       |  | 0.4   |         |
|                                                               |                     |                     |                    |  |       |         |
|                                                               |                     |                     |                    |  |       |         |
|                                                               |                     |                     | Sum of D           |  | 186.2 |         |
| II. Combined frequency of damaging mutations, % in population |                     |                     |                    |  | 0.19% |         |

Table S2

| #                                                       | Genetic position | Amino acid position<br>(mature protein) | Polymorphism<br>or ( <i>reference</i> ) | PolyPhen-2<br>Score<br>(HVAR) | Minor Allele<br>Frequency,<br>per 100 000 | Blood<br>ACE,<br>% of M |
|---------------------------------------------------------|------------------|-----------------------------------------|-----------------------------------------|-------------------------------|-------------------------------------------|-------------------------|
| <b>III. All missense mutations (including damaging)</b> |                  |                                         |                                         |                               |                                           |                         |
| 1                                                       | p.Leu30Ser       | L1S                                     | rs1196105733                            | 0.374                         | 0.8                                       |                         |
| 2                                                       | p.Leu30Phe       | L1F                                     | rs1450600177                            | <b>0.855</b>                  | 0.7                                       |                         |
| 3                                                       | p.Asp31Glu       | D2E                                     | rs1200169472                            | 0.000                         | 0.4                                       |                         |
| 4                                                       | p.Pro32Thr       | P3T                                     | rs1395554180                            | 0.002                         | 1.1                                       |                         |
| 5                                                       | p.Gly33Arg       | G4R                                     | rs1363496774                            | <b>0.890</b>                  | 0.4                                       |                         |
| 6                                                       | p.Pro36Thr       | P7T                                     | rs761292178                             | <b>0.853</b>                  | 0.8                                       |                         |
| 7                                                       | p.Pro36Leu       | P7L                                     | rs769008922                             | <b>0.914</b>                  | 1.9                                       |                         |
| 8                                                       | p.Asn38Ser       | N9S                                     | rs1327600431                            | 0.001                         | 0.9                                       |                         |
| 9                                                       | p.Ala41Thr       | A12T                                    | rs926499615                             | 0.016                         | 0.9                                       |                         |
| 10                                                      | p.Asp42Asn       | D13N                                    | rs376354160                             | 0.029                         | 3.6                                       |                         |
| 11                                                      | p.Asp42Glu       | D13E                                    | rs1188476738                            | 0.018                         | 0.8                                       |                         |
| 12                                                      | p.Glu43Ala       | E14A                                    | rs1310330954                            | <b>0.889</b>                  | 0.8                                       |                         |
| 13                                                      | p.Ala44Thr       | A15T                                    | rs765456530                             | 0.045                         | 0.4                                       |                         |
| 14                                                      | p.Gly45Arg       | <b>G16R</b>                             | rs750712925                             | <b>0.999</b>                  | 2.9                                       | Low (16)                |
| 15                                                      | p.Gly45Glu       | G16E                                    | rs763151946                             | <b>0.470</b>                  | 0.8                                       |                         |
| 16                                                      | p.Ala46Thr       | A17T                                    | rs1156835126                            | <b>0.879</b>                  | 3.3                                       |                         |
| 17                                                      | p.Glu47Arg       | Q18R                                    | rs767353320                             | 0.003                         | 4.3                                       |                         |
| 18                                                      | p.Phe49Leu       | F20L                                    | rs752407759                             | <b>0.858</b>                  | 6.4                                       |                         |
| 19                                                      | p.Ala50Thr       | A21T                                    | rs1412092470                            | 0.020                         | 0.8                                       |                         |
| 20                                                      | p.Ser52Asn       | S23N                                    | rs777523880                             | 0.027                         | 0.8                                       |                         |
| 21                                                      | p.Ser52Arg       | S23R                                    | rs368265670                             | 0.316                         | <b>65</b>                                 |                         |
| 22                                                      | p.Ser52Gly       | S23G                                    | rs756108093                             | 0.049                         | 0.8                                       |                         |
| 23                                                      | p.Tyr53Cys       | Y24C                                    | rs991760634                             | <b>0.950</b>                  | 0.4                                       |                         |
| 24                                                      | p.Asn54Ser       | N25S                                    | rs756763242                             | 0.173                         | 6.0                                       |                         |
| 25                                                      | p.Ser55Pro       | S26P                                    | rs2049631560                            | 0.047                         | 0.4                                       |                         |
| 26                                                      | p.Ser55Phe       | S26F                                    | rs886053219                             | 0.261                         | 0.8                                       |                         |
| 27                                                      | p.Ser56Asn       | S27N                                    | rs1854521219                            | <b>0.503</b>                  | 0.4                                       |                         |
| 28                                                      | p.Ala57Thr       | A28T                                    | rs2049632676                            | 0.191                         | 0.8                                       |                         |
| 29                                                      | p.Leu61Gln       | L32Q                                    | rs74552589                              | 0.046                         | 0.4                                       |                         |
| 30                                                      | p.Phe62Ser       | F33S                                    | rs1345758653                            | 0.011                         | 0.8                                       |                         |
| 31                                                      | p.Gln63His       | Q34H                                    | rs780601919                             | <b>0.618</b>                  | 0.8                                       |                         |
| 32                                                      | p.Ser64Gly       | S35G                                    | rs747292160                             | 0.104                         | 0.4                                       |                         |
| 33                                                      | p.Val65Met       | V36M                                    | rs776943620                             | 0.061                         | 2.2                                       |                         |
| 34                                                      | p.Ala66Thr       | A37T                                    | rs1450630173                            | 0.004                         | 1.1                                       |                         |
| 35                                                      | p.Ala67Gly       | A38G                                    | rs887280103                             | <b>0.974</b>                  | 1.9                                       |                         |
| 36                                                      | p.Ser68Ile       | S39I                                    | rs1331734032                            | <b>0.920</b>                  | 0.4                                       |                         |
| 37                                                      | p.Ser68Arg       | S39R                                    | rs1170287329                            | <b>0.446</b>                  | 4.7                                       |                         |
| 38                                                      | p.His71Tyr       | H42Y                                    | rs773257897                             | 0.000                         | 0.8                                       |                         |
| 39                                                      | p.Asp72Tyr       | D43Y                                    | rs752559637                             | <b>0.692</b>                  | 5.9                                       |                         |
| 40                                                      | p.Asn74Asp       | N45D                                    | rs1331766879                            | 0.242                         | 0.7                                       |                         |
| 41                                                      | p.Asn74Ser       | N45S                                    | rs1235548322                            | <b>0.489</b>                  | 0.8                                       |                         |
| 42                                                      | p.Ile75Asn       | I46N                                    | rs2049633221                            | <b>0.974</b>                  | <b>30</b>                                 |                         |
| 43                                                      | p.Ile75Phe       | I46F                                    | rs375602836                             | <b>0.944</b>                  | 1.5                                       |                         |
| 44                                                      | p.Thr76Ser       | T47S                                    | rs1465491488                            | 0.102                         | 0.7                                       |                         |
| 45                                                      | p.Ala77Thr       | A48T                                    | rs867626302                             | 0.009                         | 2.2                                       |                         |
| 46                                                      | p.Glu78Gln       | E49Q                                    | rs778615098                             | 0.236                         | 3.7                                       |                         |
| 47                                                      | p.Arg82Leu       | R53L                                    | rs997125723                             | 0.002                         | 0.4                                       |                         |
| 48                                                      | p.Gln83Lys       | Q54K                                    | rs1344103805                            | 0.032                         | 0.8                                       |                         |

Table S2

|     |             |       |              |       |     |  |
|-----|-------------|-------|--------------|-------|-----|--|
| 49  | p.Glu84Lys  | E55K  | rs1345164089 | 0.758 | 0.8 |  |
| 50  | p.Glu85Lys  | E56K  | rs150382846  | 0.173 | 4.1 |  |
| 51  | p.Ala87Ser  | A58S  | rs1440389747 | 0.022 | 0.4 |  |
| 52  | p.Leu88Val  | L59V  | rs762976911  | 0.077 | 0.4 |  |
| 53  | p.Leu89His  | L60H  | rs765857431  | 0.914 | 2.9 |  |
| 54  | p.Ser90Gly  | S61G  | rs751050925  | 0.016 | 4.1 |  |
| 55  | p.Ser90Asn  | S61N  | rs1221928144 | 0.002 | 0.8 |  |
| 56  | p.Gln91Glu  | Q62E  | rs1414717313 | 0.122 | 0.7 |  |
| 57  | p.Glu92Gly  | E63G  | rs767149889  | 0.598 | 1.1 |  |
| 58  | p.Phe93Val  | F64V  | rs122622664  | 0.917 | 0.4 |  |
| 59  | p.Ala94Val  | A65V  | rs753078890  | 0.024 | 4.1 |  |
| 60  | p.Ala96Pro  | A67P  | rs756407366  | 0.332 | 0.4 |  |
| 61  | p.Ala96Val  | A67V  | rs1193074438 | 0.003 | 0.4 |  |
| 62  | p.Trp97Ser  | W68S  | rs2049646473 | 0.086 | 0.4 |  |
| 63  | p.Trp97Cys  | W68C  | rs1471264963 | 0.617 | 0.4 |  |
| 64  | p.Gln99Glu  | Q70E  | rs749853877  | 0.002 | 5.7 |  |
| 65  | p.Lys100Glu | K71E  | rs1407660027 | 0.079 | 0.4 |  |
| 66  | p.Ala101Thr | A72T  | rs757757495  | 0.357 | 1.6 |  |
| 67  | p.Glu103Asp | E74D  | rs1439594637 | 0.017 | 0.4 |  |
| 68  | p.Tyr105Cys | Y76C  | rs1220739409 | 0.769 | 3.2 |  |
| 69  | p.Glu106Gly | E77G  | rs1279075366 | 0.001 | 0.7 |  |
| 70  | p.Pro107Arg | P78R  | rs772201818  | 0.383 | 2.9 |  |
| 71  | p.Glu110His | E81H  | rs780364983  | 0.077 | 0.4 |  |
| 72  | p.Thr113Met | T84M  | rs1271259475 | 0.174 | 0.4 |  |
| 73  | p.Asp114His | D85H  | rs1568035450 | 0.987 | 0.4 |  |
| 74  | p.Pro115Arg | P86R  | rs1334067073 | 0.520 | 0.4 |  |
| 75  | p.Pro115Ser | P86S  | rs1188044442 | 0.053 | 0.8 |  |
| 76  | p.Arg118Cys | R89C  | rs1439803774 | 0.989 | 0.4 |  |
| 77  | p.Arg118Leu | R89L  | rs773121528  | 0.376 | 1.6 |  |
| 78  | p.Ile120Phe | I91F  | rs762839851  | 0.354 | 0.9 |  |
| 79  | p.Ile120Thr | I91T  | rs770863321  | 0.203 | 0.4 |  |
| 80  | p.Ile121Val | I92V  | rs539067889  | 0.050 | 2.6 |  |
| 81  | p.Ile121Thr | I92T  | rs1416423148 | 0.922 | 0.4 |  |
| 82  | p.Gly122Arg | G93R  | rs1170830801 | 0.030 | 4.7 |  |
| 83  | p.Ala123Asp | A94D  | rs2049648175 | 0.012 | 0.4 |  |
| 84  | p.Val124Ala | V95A  | rs2049648205 | 0.217 | 0.7 |  |
| 85  | p.Arg125Cys | R96C  | rs759033270  | 0.801 | 3.4 |  |
| 86  | p.Arg125Pro | R96P  | rs904130482  | 0.667 | 0.4 |  |
| 87  | p.Thr126Ile | T97I  | rs936814960  | 0.048 | 0.5 |  |
| 88  | p.Gly128Ala | G99A  | rs767085054  | 0.833 | 2.3 |  |
| 89  | p.Ala135Thr | A106T | rs752416873  | 0.018 | 1.0 |  |
| 90  | p.Lys136Glu | K107E | rs2049648986 | 0.109 | 0.8 |  |
| 91  | p.Lys136Thr | K107T | rs760310248  | 0.634 | 1.5 |  |
| 92  | p.Arg137Gly | R108G | rs764488884  | 0.747 | 4.0 |  |
| 93  | p.Arg137Trp | R108W |              | 1.000 |     |  |
| 94  | p.Arg137Gln | R108Q | rs556087296  | 0.051 | 2.7 |  |
| 95  | p.Gln139Glu | Q110E | rs750481872  | 0.071 | 1.6 |  |
| 96  | p.Asn141Lys | N112K | rs746469812  | 0.839 | 3.0 |  |
| 97  | p.Ser145Ile | S116I | rs768306471  | 0.994 | 0.4 |  |
| 98  | p.Ser145Arg | S116R | rs776279706  | 0.938 | 0.9 |  |
| 99  | p.Asn146Ile | N117I | rs761366166  | 0.148 | 0.8 |  |
| 100 | p.Met147Val | M118V | rs201716509  | 0.916 | 0.8 |  |
| 101 | p.Met147Thr | M118T | rs773425152  | 0.996 | 0.8 |  |
| 102 | p.Met147Arg | M118R |              | 1.000 |     |  |
| 103 | p.Ser148Asn | S119N | rs147057007  | 0.006 | 0.4 |  |

Table S2

|     |             |         |              |              |            |  |
|-----|-------------|---------|--------------|--------------|------------|--|
| 104 | p.Arg149Leu | R120L   | rs766945182  | 0.146        | 6.4        |  |
| 105 | p.Ile150Met | I121M   | rs1370591668 | <b>0.870</b> | 0.4        |  |
| 106 | p.Ser152Thr | S123T   | rs75214560   | 0.258        | 0.4        |  |
| 107 | p.Thr153Ala | T124A   | rs767705427  | 0.059        | 1.2        |  |
| 108 | p.Thr153Ile | T124I   | rs201277497  | <b>0.817</b> | 1.2        |  |
| 109 | p.Ala154Thr | A125T   | rs13306087   | 0.330        | <b>84</b>  |  |
| 110 | p.Ala154Val | A125V   | rs569318874  | <b>0.486</b> | 0.4        |  |
| 111 | p.Lys155Asn | K126N   | rs143320537  | <b>0.727</b> | <b>32</b>  |  |
| 112 | p.Val156Phe | V127F   | rs745608171  | <b>0.940</b> | 0.4        |  |
| 113 | p.Cys157Ser | C128Ser | rs2049664994 | <b>0.879</b> | 1.5        |  |
| 114 | p.Asn160His | N131H   | rs768220716  | 0.154        | 1.6        |  |
| 115 | p.Asn160Ser | N131S   | rs117134739  | 0.032        | 3.8        |  |
| 116 | p.Thr162Ile | T133I   | rs1459787773 | 0.296        | 1.6        |  |
| 117 | p.Ala163Asp | A134D   | rs1378946788 | 0.045        | 1.1        |  |
| 118 | p.Trp166Arg | W137R   | rs1015195326 | <b>0.911</b> | 0.8        |  |
| 119 | p.Ser167Phe | S138F   | rs1362069107 | <b>0.924</b> | 0.7        |  |
| 120 | p.Leu168Pro | L139P   | rs139076951  | <b>0.966</b> | <b>32</b>  |  |
| 121 | p.Thr173Ile | T144I   | rs1277204441 | <b>0.521</b> | 2.4        |  |
| 122 | p.Asn174Ser | N145S   | rs751322397  | 0.004        | 3.0        |  |
| 123 | p.Ile175Asn | I146N   | rs1346356853 | <b>0.894</b> | 2.1        |  |
| 124 | p.Leu176Pro | L147P   | rs755647501  | <b>0.997</b> | 0.4        |  |
| 125 | p.Ser178Phe | S149F   | rs1305248868 | 0.198        | 1.6        |  |
| 126 | p.Ser179Leu | S150L   | rs374910265  | <b>0.993</b> | 0.8        |  |
| 127 | p.Arg180Gln | R151Q   | rs369022610  | 0.299        | 4.4        |  |
| 128 | p.Ser181Thr | S152T   | rs1213510652 | 0.032        | 0.8        |  |
| 129 | p.Tyr182Cys | Y153C   | rs772645129  | <b>0.999</b> | 0.4        |  |
| 130 | p.Ala183Thr | A154T   | rs12720754   | 0.230        | <b>183</b> |  |
| 131 | p.Met184Val | M155V   | rs776669133  | 0.002        | 0.8        |  |
| 132 | p.Met184Iso | M155I   | rs1172383595 | 0.002        | 0.7        |  |
| 133 | p.Leu185Phe | L155F   | rs762060056  | <b>0.999</b> | 1.2        |  |
| 134 | p.Ala188Thr | A159T   | rs1568036282 | 0.294        | 0.7        |  |
| 135 | p.Glu190Gln | E161Q   | rs751371256  | 0.274        | 1.2        |  |
| 136 | p.His193Arg | H164R   | rs1461565755 | <b>0.853</b> | 0.4        |  |
| 137 | p.Asn194Ser | N165S   | rs2049677786 | <b>0.504</b> | 0.4        |  |
| 138 | p.Ala195Thr | A166T   | rs767340249  | 0.129        | 2.8        |  |
| 139 | p.Ala195Val | A166V   | rs376986357  | 0.101        | 8.3        |  |
| 140 | p.Ala196Val | A167V   | rs756060281  | 0.006        | 0.8        |  |
| 141 | p.Gly197Asp | G168D   | rs753361228  | <b>0.994</b> | 2.8        |  |
| 142 | p.Iso198Leu | I169L   | rs778647989  | 0.002        | 0.4        |  |
| 143 | p.Pro199Leu | P170L   | rs553520266  | <b>0.834</b> | 4.8        |  |
| 144 | p.Lys201Thr | K172T   | rs769174358  | <b>0.997</b> | 0.8        |  |
| 145 | p.Lys201Glu | K172E   | rs2049677865 | <b>0.978</b> | 0.4        |  |
| 146 | p.Pro202Leu | P173L   | rs148460287  | <b>0.785</b> | <b>32</b>  |  |
| 147 | p.Leu203Pro | L174P   | rs1175840645 | <b>0.556</b> | 0.7        |  |
| 148 | p.Tyr204Asn | Y175N   | rs2049678156 | <b>1.000</b> | 1.4        |  |
| 149 | p.Glu205Lys | E176K   | rs763223753  | 0.038        | 3.6        |  |
| 150 | p.Asp206Val | D177V   | rs767268916  | 0.177        | 0.4        |  |
| 151 | p.Ala209Thr | A180T   | rs775328930  | 0.008        | 0.8        |  |
| 152 | p.Ser211Gly | S182G   | rs760563261  | 0.412        | 0.8        |  |
| 153 | p.Ser211Ile | S182I   | rs148144906  | <b>0.976</b> | 0.8        |  |
| 154 | p.Asn212Asp | N183D   | rs764076582  | <b>0.988</b> | 2.0        |  |
| 155 | p.Asn212Lys | N183K   | rs753408382  | <b>1.000</b> | 3.2        |  |
| 156 | p.Ala214Thr | A185T   | rs142677199  | <b>0.962</b> | 3.2        |  |
| 157 | pAla214Gly  | A185G   | rs1354264426 | <b>0.480</b> | 1.6        |  |
| 158 | p.Lys216Arg | K187R   | rs2049678808 | 0.006        | 6.0        |  |

Table S2

|     |              |                    |                      |       |      |           |
|-----|--------------|--------------------|----------------------|-------|------|-----------|
| 159 | p.Gln217Glu  | Q188E              | rs1209300158         | 0.011 | 0.8  |           |
| 160 | p.Gly219Ser  | G190S              | rs750097881          | 0.994 | 2.1  |           |
| 161 | p.Gly219Val  | G190V              | rs769812428          | 0.998 | 0.4  |           |
| 162 | p.Phe220Leu  | F191L              | rs772619837          | 0.239 | 0.4  |           |
| 163 | p.Asp222Glu  | D193E              | rs751284054          | 0.857 | 0.4  |           |
| 164 | p.Asp222Asn  | D193N              | rs765803965          | 0.812 | 0.4  |           |
| 165 | p. Thr223Met | T194M              | rs759167880          | 0.351 | 2.3  |           |
| 166 | p.Ala225Ser  | A196S              | rs753023714          | 0.383 | 5.2  |           |
| 167 | p.Tyr226His  | Y197H              | rs756638375          | 0.980 | 0.4  |           |
| 168 | p.Trp227Arg  | W198R              | rs111998398          | 1.000 | 0.4  |           |
| 169 | p.Arg228Cys  | R199C              | rs141543325; (7)     | 0.994 | 24   |           |
| 170 | p.Arg228His  | R199H              | rs1455284992         | 0.987 | 1.6  |           |
| 171 | p.Ser229Phe  | S200F              | rs1376819053         | 0.441 | 0.4  |           |
| 172 | p.Trp230Cys  | W201C              | rs757421466          | 0.635 | 0.8  |           |
| 173 | p.Asn232Thr  | N203T              | rs1160172583         | 0.012 | 0.4  |           |
| 174 | p.Ser233Thr  | S204T              | rs901989090          | 0.022 | 0.4  |           |
| 175 | p.Ser233Phe  | S204F              | rs998995786          | 0.959 | 0.4  |           |
| 176 | p.Pro234Ser  | P205S              | rs778841130          | 0.146 | 0.8  |           |
| 177 | p.Glu237Lys  | E208K              | rs773728684          | 0.050 | 1.6  |           |
| 178 | p.Asp239Tyr  | D210Y              | rs77294580rs         | 0.026 | 0.4  |           |
| 179 | p.Glu241Gln  | E212Q              | rs763411587          | 0.239 | 0.4  |           |
| 180 | p.His242Tyr  | H213Y              | rs749170321          | 0.004 | 0.4  |           |
| 181 | p.Tyr244Cys  | Y215C              | rs3730025; (7,16-18) | 1.000 | 1068 | 73 (4,19) |
| 182 | p.Tyr244His  | Y215H              | rs2049686933         | 0.998 | 0.4  |           |
| 183 | p.Gln245Glu  | Q216E              | rs2049687041         | 0.004 | 1.1  |           |
| 184 | p.Leu247Pro  | L218P              | rs1469557705         | 0.997 | 0.4  |           |
| 185 | p.Glu248Gln  | E219Q              | rs775849960          | 0.144 | 0.8  |           |
| 186 | p.Pro249Leu  | P220L              | rs760966452          | 0.999 | 0.4  |           |
| 187 | p.Leu250Val  | L221V              | rs1409716305         | 0.979 | 0.8  |           |
| 188 | p.Leu250Pro  | L221P              | s764359224           | 1.000 | 0.4  |           |
| 189 | p.Tyr251His  | Y222H              | rs1279450935         | 1.000 | 0.4  |           |
| 190 | p.Leu252Pro  | L223P              | rs2049687508         | 0.997 | 0.4  |           |
| 191 | p.Val256Val  | A227V              | rs758714422          | 0.991 | 0.8  |           |
| 192 | p.Phe257Leu  | F228L              | rs780365048          | 0.415 | 0.4  |           |
| 193 | p.Val258Ile  | V229I              | rs747960808          | 0.546 | 1.9  |           |
| 194 | p.Arg259Cys  | R230C              | rs777408360          | 1.000 | 1.2  |           |
| 195 | p.Arg259His  | R230H              | rs370903033; (2,9)   | 0.995 | 1.2  | Low       |
| 196 | p.Arg260Cys  | R231C              | rs147670020          | 0.805 | 0.8  |           |
| 197 | p.Arg260His  | R231H              | rs150011877          | 0.426 | 2.4  |           |
| 198 | p.Ala261Ser  | A232S <sup>c</sup> | rs4303; (20)         | 0.848 | 112  |           |
| 199 | p.Arg261Val  | A232V              | rs564933233          | 0.589 | 0.8  |           |
| 200 | p.His263Tyr  | H234Y              | rs1478780828         | 0.010 | 1.1  |           |
| 201 | p.Arg264Cys  | R235C              | rs1249291422         | 0.972 | 2.8  |           |
| 202 | p.Arg264His  | R235H              | rs776828648          | 0.314 | 0.8  |           |
| 203 | p.Tyr266Cys  | Y237C              | rs373616533          | 1.000 | 0.8  |           |
| 204 | p.Gly267Arg  | G238R              | rs149412997; (7)     | 0.973 | 33   |           |
| 205 | p.Asp268Asn  | D239N              | rs1403582878         | 0.146 | 0.7  |           |
| 206 | p.Asp268Glu  | D239E              | rs766561924          | 0.025 | 0.4  |           |
| 207 | p.Tyr270Asn  | Y241N              | rs2049688901         | 0.119 | 6.0  |           |
| 208 | p.Ile271Val  | I242V              | rs530535736          | 0.065 | 0.8  |           |
| 209 | p.Gly275Arg  | G246R              | rs1316614976         | 0.897 | 2.1  |           |
| 210 | p.Pro276Ala  | P247A              | rs777657188          | 0.371 | 0.7  |           |
| 211 | p.Ile277Val  | I248V              | rs757233793          | 0.753 | 1.2  |           |
| 212 | p.Pro278Thr  | P249T              | rs1229110590         | 1.000 | 0.4  |           |
| 213 | p.His280Arg  | H251R              | rs1303022378         | 0.999 | 0.8  |           |

Table S2

|     |             |       |                    |       |     |        |
|-----|-------------|-------|--------------------|-------|-----|--------|
| 214 | p.Leu281Gln | L252Q | rs778759109        | 1.000 | 0.8 |        |
| 215 | p.Leu282Pro | L253P | rs1040577967       | 0.999 | 1.1 |        |
| 216 | p.Met285Val | M256V | rs923234679        | 0.712 | 0.4 |        |
| 217 | p.Met285Thr | M256T | rs747832023        | 1.000 | 1.2 |        |
| 218 | p.Met285Ile | M256I | rs1749235389       | 0.712 | 0.8 |        |
| 219 | p.Trp286Gly | W257G | rs1365148386       | 0.999 | 0.4 |        |
| 220 | p.Ala287Ser | A258S | rs1218416633       | 0.690 | 0.4 |        |
| 221 | p.Ala287Val | A258V | rs770340552        | 0.987 | 0.4 |        |
| 222 | p.Gln288Arg | Q259R | rs199591851; (2,9) | 0.998 | 74  | 68 (4) |
| 223 | p.Ser289Asn | S260N | rs763587114        | 0.354 | 0.4 |        |
| 224 | p.Trp290Ser | W261S | rs1266264733       | 1.000 | 0.4 |        |
| 225 | p.Glu291Lys | E262K | rs1464640594       | 0.194 | 0.4 |        |
| 226 | p.Glu291Ala | E262A | rs771517816        | 0.172 | 0.4 |        |
| 227 | p.Asp295Asn | D266N | rs989500910        | 0.308 | 0.4 |        |
| 228 | p.Met296Val | M267V | rs1190943736       | 0.011 | 0.4 |        |
| 229 | p.Val297Met | V268M | rs61740982         | 0.267 | 4.8 |        |
| 230 | p.Val298Met | V269M | rs752924819        | 0.054 | 1.1 |        |
| 231 | p.Pro299Thr | P270T | rs760860250        | 0.983 | 0.4 |        |
| 232 | p.Asp302Tyr | D273Y | rs139813210        | 0.890 | 0.4 |        |
| 233 | p.Pro304Leu | P275L | rs1419966263       | 0.105 | 0.4 |        |
| 234 | p.Asn305Ser | N276S | rs141186617        | 0.000 | 11  |        |
| 235 | p.Leu306Arg | L277R | rs1044992578       | 0.315 | 0.4 |        |
| 236 | p.Asp307Asn | D278N | rs532619151        | 0.875 | 0.4 |        |
| 237 | p.Asp307Gly | D278G | rs754511687        | 0.995 | 0.8 |        |
| 238 | p.Thr309Ala | T280A | rs747796419        | 0.700 | 0.4 |        |
| 239 | p.Ser310Gly | S281G | rs144137849        | 0.009 | 18  |        |
| 240 | p.Ser310Asn | S281N | rs774789681        | 0.003 | 0.4 |        |
| 241 | p.Thr311Ser | T282S | rs746377185        | 0.008 | 1.2 |        |
| 242 | p.Met312Val | M283V | rs367998749        | 0.738 | 2.4 |        |
| 243 | p.Met312Thr | M283T | rs201588518        | 0.999 | 1.6 |        |
| 244 | p.Gly316Cys | G287C | rs561813163        | 0.994 | 0.4 |        |
| 245 | p.Gly316Val | G287V | rs2049710108       | 0.998 | 0.4 |        |
| 246 | p.Ala319Ser | A290S | rs34126458         | 0.120 | 90  |        |
| 247 | p.Ala319Val | A290V | rs2049710282       | 0.019 | 0.4 |        |
| 248 | p.Thr320Ala | T291A | rs1384833654       | 0.030 | 0.4 |        |
| 249 | p.Thr320Met | T291M | rs139137100        | 0.163 | 0.7 |        |
| 250 | p.His321Tyr | H292Y | rs2049710489       | 0.102 | 0.7 |        |
| 251 | p.Met322Val | M293V | rs1391141938       | 0.738 | 0.8 |        |
| 252 | p.Arg324Trp | R295W | rs35141294         | 0.975 | 202 |        |
| 253 | p.Arg324Gln | R295Q | rs374029266        | 0.028 | 3.2 |        |
| 254 | p.Val325Met | V296M | rs771762179        | 0.207 | 0.4 |        |
| 255 | p.Ala326Thr | A297T | rs1273653682       | 0.940 | 1.6 |        |
| 256 | p.Glu328Lys | E299K | rs992848550        | 0.240 | 0.8 |        |
| 257 | p.Phe330Leu | F301L | rs763740829        | 0.954 | 3.6 |        |
| 258 | p.Thr331Ser | T302S | rs1444816395       | 0.030 | 0.7 |        |
| 259 | p.Leu333Val | L304V | rs983222441        | 0.824 | 0.7 |        |
| 260 | p.Leu333Gln | L304Q | rs761390621; (2)   | 1.000 | 0.7 | Low    |
| 261 | p.Glu334Gln | E305Q | rs1336871330       | 0.295 | 0.7 |        |
| 262 | p.Pro337Ser | P308S | rs764882826        | 0.077 | 0.4 |        |
| 263 | p.Pro337Leu | P308L | rs750754792        | 0.626 | 1.2 |        |
| 264 | p.Met338Val | M309V | rs1414191617       | 0.307 | 1.5 |        |
| 265 | p.Met338Ile | M309I | rs1422578392       | 0.797 | 0.7 |        |
| 266 | p.Pro339Ser | P310S | rs1455859263       | 0.392 | 0.8 |        |
| 267 | p.Glu341Gln | E312Q | rs201456235        | 0.172 | 1.2 |        |
| 268 | p.Phe342Ser | F313S | rs755446607        | 1.000 | 0.4 |        |

Table S2

|     |             |       |                   |       |     |         |
|-----|-------------|-------|-------------------|-------|-----|---------|
| 269 | p.Ser346Leu | S317L | rs781272495       | 0.994 | 1.2 |         |
| 270 | p.Leu348Pro | L319P | rs769913687       | 0.995 | 0.4 |         |
| 271 | p.Glu349Ala | E320A | rs778126198       | 0.203 | 0.4 |         |
| 272 | p.Lys350Gln | K321Q | rs2049712159      | 0.060 | 0.4 |         |
| 273 | p.Pro351Leu | P322L | rs2229839; (7)    | 0.832 | 24  |         |
| 274 | p.Asp353Asn | D324N | rs148193919       | 0.100 | 22  |         |
| 275 | p.Gly354Arg | G325R | rs56394458; (7)   | 0.998 | 780 | 62 (4)  |
| 276 | p.Arg355Trp | R326W | rs776297611       | 0.993 | 2.0 |         |
| 277 | p.Arg355Gln | R326Q | rs761322765       | 0.487 | 1.6 |         |
| 278 | p.Glu356Lys | E327K | rs553718986       | 0.014 | 0.4 |         |
| 279 | p.Val357Met | V328M | rs1273328602      | 0.296 | 0.7 |         |
| 280 | p.Val358Met | V329M | rs764651696       | 0.928 | 1.2 |         |
| 281 | p.His360Tyr | H331Y | rs199690936       | 0.442 | 0.4 |         |
| 282 | p.His360Arg | H331R | rs2049713014      | 0.456 | 0.4 |         |
| 283 | p.Ala361Thr | A332T | rs546455400       | 0.992 | 6.0 |         |
| 284 | p.Ser362Thr | S333T | rs1274888100      | 0.460 | 0.8 |         |
| 285 | p.Ser362Trp | S333W | rs142328237; (21) | 1.000 | 6.8 | 71 (21) |
| 286 | p.Ala363Pro | A334P | rs1443267419      | 0.999 | 0.4 |         |
| 287 | p.Ala363Val | A334V | rs370491569       | 0.999 | 1.2 |         |
| 288 | p.Thr364Cys | W335C | rs1325867826      | 0.996 | 0.4 |         |
| 289 | p.Asn368Ser | N339S | rs369713789       | 0.098 | 0.8 |         |
| 290 | p.Asn368Lys | N339K | rs1482676646      | 0.557 | 1.1 |         |
| 291 | p.Arg369Gly | R340G | rs373357172       | 0.098 | 1.5 |         |
| 292 | p.Lys370Arg | K341R | rs1176719016      | 0.008 | 0.4 |         |
| 293 | p.Arg373Ser | R344S | rs189243320       | 1.000 | 3.2 |         |
| 294 | p.Lys375Arg | K345R | rs778168348       | 0.983 | 0.4 |         |
| 295 | p.Arg379Trp | R350W | rs750724647       | 0.983 | 4.4 |         |
| 296 | p.Arg379Gln | R350Q | rs13306085        | 0.983 | 2.4 |         |
| 297 | p.Val380Asp | V351D | rs752385390       | 0.776 | 0.4 |         |
| 298 | p.Thr381Met | T352M | rs150466411; (7)  | 0.998 | 85  |         |
| 299 | p.Met382Val | M353V | rs370890237       | 0.236 | 0.4 |         |
| 300 | p.Met382Thr | M353T | rs2049726728      | 0.291 | 0.4 |         |
| 301 | p.Met382Ile | M353I | rs770475936       | 0.316 | 0.4 |         |
| 302 | p.Asp383Tyr | D354Y | rs2049726795      | 0.947 | 1.1 |         |
| 303 | p.Asp383Gly | D354G | rs374899854       | 0.215 | 0.4 |         |
| 304 | p.Thr387Ala | T358A | rs1347736201      | 0.355 | 1.6 |         |
| 305 | p.His389Gln | H360Q | rs1405848294      | 1.000 | 0.7 |         |
| 306 | p.Met392Thr | M363T | rs138418851       | 0.991 | 4.0 |         |
| 307 | p.Gly393Asp | G364D | rs2049727156      | 0.999 | 0.7 |         |
| 308 | p.His394Arg | H365R | rs775932125       | 0.977 | 0.8 |         |
| 309 | p.Ile395Met | I366M | rs760885341       | 0.896 | 0.4 |         |
| 310 | p.Gln400Lys | Q371K | rs771386010       | 0.334 | 1.2 |         |
| 311 | p.Gln400Arg | Q371R | rs548450663       | 0.436 | 0.4 |         |
| 312 | p.Tyr401Cys | Y372C | rs765449601       | 0.986 | 1.2 |         |
| 313 | p.Lys402Met | K373M | rs1329993082      | 0.940 | 0.8 |         |
| 314 | p.Asp403Ala | D374A | rs763292265       | 0.045 | 0.8 |         |
| 315 | p.Leu404Val | L375V | rs1229622121      | 0.112 | 0.7 |         |
| 316 | p.Pro405Arg | P376R | rs766454164       | 0.996 | 1.5 |         |
| 317 | p.Val406Ile | V377I | rs201117983       | 0.050 | 31  |         |
| 318 | p.Ser407Phe | S378F | rs570424963       | 0.354 | 1.5 |         |
| 319 | p.Leu408Pro | L379P | rs2049728056      | 0.999 | 0.4 |         |
| 320 | p.Arg409Cys | R380C | rs199746395       | 1.000 | 2.4 |         |
| 321 | p.Arg409His | R380H | rs371833006       | 0.995 | 4.8 |         |
| 322 | p.Arg410Trp | R381W | rs370836540       | 0.783 | 2.8 |         |
| 323 | p.Arg410Gln | R381Q | rs145172277       | 0.004 | 75  |         |

Table S2

|     |             |       |              |       |     |          |
|-----|-------------|-------|--------------|-------|-----|----------|
| 324 | p.Gly411Arg | G382R | rs1347844823 | 1.000 | 0.4 |          |
| 325 | p.Ala412Ser | A383S | rs779643154  | 0.987 | 0.8 |          |
| 326 | p.Asn413Ser | N384S | rs1308632106 | 0.848 | 15  |          |
| 327 | p.Asn413Lys | N384K | rs1352223425 | 1.000 | 1.6 |          |
| 328 | p.Gly415Ser | G386S | rs149252911  | 0.990 | 5.6 |          |
| 329 | p.Gly415Asp | G386D | rs1350271986 | 0.999 | 0.4 |          |
| 330 | p.His417Arg | H388R | rs1229041283 | 0.910 | 0.4 |          |
| 331 | p.Glu418Lys | E389K | rs1599141410 | 0.998 | 55  | Korean   |
| 332 | p.Ala419Ser | A390S | rs1311367540 | 0.963 | 1.1 |          |
| 333 | p.Ile420Thr | I391T | rs144494842  | 0.996 | 22  |          |
| 334 | p.Ile420Val | I391V | rs2049728955 | 0.266 | 0.4 |          |
| 335 | p.Gly421Glu | G392E | rs2049729061 | 0.999 | 6.0 |          |
| 336 | p.Val423Met | V394M | rs148018765  | 0.697 | 7.6 |          |
| 337 | p.Ala425Val | A396V | rs372626836  | 0.811 | 2.8 |          |
| 338 | p.Leu426Arg | L397R | rs1295075641 | 1.000 | 0.8 |          |
| 339 | p.Ser427Leu | S398L | rs1484293906 | 0.995 | 2.4 |          |
| 340 | p.Val428Leu | V399L | rs1368163348 | 0.916 | 0.4 |          |
| 341 | p.Val428Gly | V399G | rs774484341  | 0.997 | 2.8 |          |
| 342 | p.Ser429Phe | S400F | rs1430341434 | 0.316 | 8.7 |          |
| 343 | p.Pro431Leu | P402L | rs2049729701 | 0.907 | 0.4 |          |
| 344 | p.His433Arg | H404R | rs763905584  | 0.928 | 0.8 |          |
| 345 | p.Leu434Val | L405V | rs753578845  | 0.859 | 11  |          |
| 346 | p.His435Leu | H406L | rs757195769  | 0.019 | 0.4 |          |
| 347 | p.Lys436Arg | K407R | rs765088731  | 0.077 | 0.4 |          |
| 348 | p.Gly438Ser | G409S | rs1051245483 | 0.844 | 0.8 |          |
| 349 | p.Gly438Asp | G409D | rs757908100  | 0.927 | 0.8 |          |
| 350 | p.Leu440Val | L411V | rs199697957  | 0.364 | 12  |          |
| 351 | p.Leu440Gln | L411Q | rs748465912  | 0.991 | 1.1 |          |
| 352 | p.Asp441Asn | D412N | rs770430455  | 0.045 | 0.8 |          |
| 353 | p.Arg442Cys | R413C | rs749779360  | 0.002 | 2.0 |          |
| 354 | p.Arg442His | R413H | rs35865660   | 0.001 | 132 |          |
| 355 | p.Asn445Asp | N416D | rs776411660  | 0.012 | 0.4 |          |
| 356 | p.Asn445Lys | N416K | rs2037090472 | 0.143 | 0.4 |          |
| 357 | p.Asp446Asn | D417N | rs2049730943 | 0.170 | 0.7 |          |
| 358 | p.Thr447Ala | T418A | rs761659396  | 0.004 | 1.5 |          |
| 359 | p.Thr447Met | T418M | rs746314800  | 0.046 | 4.8 |          |
| 360 | p.Ser449Gly | S420G | rs2049737716 | 0.104 | 0.4 |          |
| 361 | p.Ser449Thr | S420T | rs373076770  | 0.059 | 0.7 |          |
| 362 | p.Asp450Asn | D421N | rs185115105  | 0.310 | 0.8 |          |
| 363 | p.Ile451Val | I422V | rs1401663578 | 0.305 | 0.4 |          |
| 364 | p.Ile451Thr | I422T | rs1158360384 | 0.820 | 1.4 |          |
| 365 | p.Lys456Gln | K427Q | rs2049738166 | 0.121 | 6.0 |          |
| 366 | p.Ala458Val | A429V | rs1388880245 | 0.963 | 0.4 |          |
| 367 | p.Arg459Gln | R430Q | (22)         |       |     | Low (22) |
| 368 | p.Ile462Phe | I433F | rs1370566904 | 0.861 | 0.8 |          |
| 369 | p.Ile462Asn | I433N | rs1289633744 | 1.000 | 0.4 |          |
| 370 | p.Phe464Ile | F435I | rs2049738685 | 0.869 | 0.4 |          |
| 371 | p.Gly468Cys | G439C | rs1170017440 | 0.996 | 1.4 |          |
| 372 | p.Val471Met | V442M | rs768818130  | 0.323 | 0.8 |          |
| 373 | p.Trp474Arg | W445R | rs772897915  | 0.999 | 0.4 |          |
| 374 | p.Arg475Cys | R446C | rs770628079  | 1.000 | 1.6 |          |
| 375 | p.Arg475His | R446H | rs774394975  | 1.000 | 4.3 |          |
| 376 | p.Gly477Glu | G448E | rs986987823  | 0.279 | 1.1 |          |
| 377 | p.Phe479Val | F450V | rs760413658  | 0.999 | 0.4 |          |
| 378 | p.Ser480Asn | S451N | rs886053220  | 0.055 | 0.4 |          |

Table S2

|     |             |       |                      |       |     |          |
|-----|-------------|-------|----------------------|-------|-----|----------|
| 379 | p.Arg482Cys | R453C | rs201540553; (7)     | 0.649 | 19  | Low (16) |
| 380 | p.Arg482His | R453H | rs757694144          | 0.006 | 4.4 |          |
| 381 | p.Thr483Ile | T454I | rs2049740100         | 0.833 | 0.4 |          |
| 382 | p.Pro484Arg | P455R | rs1365864797         | 0.615 | 0.4 |          |
| 383 | p.Pro485Ala | P456A | rs202178737          | 0.059 | 9.1 |          |
| 384 | p.Pro485Arg | P456R | rs28730839; (7)      | 0.301 | 48  | 98 (4)   |
| 385 | p.Pro485Leu | P456L | (9)                  |       |     | Low (9)  |
| 386 | p.Ser486Phe | S457F | rs748305912          | 0.923 | 0.4 |          |
| 387 | p.Arg487Cys | R458C | rs149784122          | 0.972 | 25  |          |
| 388 | p.Arg487His | R458H | rs376430907          | 0.235 | 7.2 |          |
| 389 | p.Tyr488Ser | Y459S | rs948392443          | 0.999 | 1.1 |          |
| 390 | p.Asn489Asp | N460D | rs745820101          | 0.999 | 2.1 |          |
| 391 | p.Asn489Lys | N460K | rs145755731          | 1.000 | 0.8 |          |
| 392 | p.Asp491Asn | D462N | rs371335496          | 0.152 | 0.4 |          |
| 393 | p.Asp491Glu | D462E | rs1254289491         | 0.054 | 0.7 |          |
| 394 | p.Trp493Arg | W464R | rs2049741339         | 0.999 | 0.4 |          |
| 395 | p.Trp493Cys | W464C | rs1182135727         | 0.992 | 0.4 |          |
| 396 | p.Tyr494Asp | Y465D | rs760325775; (23)    | 0.011 | 2.4 | 700 (23) |
| 397 | p.Leu495Phe | L466F | rs374169715          | 0.974 | 0.4 |          |
| 398 | p.Arg496Gln | R467Q | rs761345398; (22,24) | 1.000 | 1.9 | Low (22) |
| 399 | p.Thr497Ala | T468A | rs766717973          | 0.382 | 0.4 |          |
| 400 | p.Lys498Arg | K469R | rs752110462          | 0.217 | 2.4 |          |
| 401 | p.Tyr499Cys | Y470C | rs779110765          | 0.999 | 2.8 |          |
| 402 | p.Gln500Arg | Q471R | rs1330033201         | 0.956 | 0.8 |          |
| 403 | p.Gly501Arg | G472R | rs886053221          | 1.000 | 5.0 |          |
| 404 | p.Gly501Glu | G472E | rs767656727          | 1.000 | 0.4 |          |
| 405 | p.Cys503Ser | C474S | rs1485835785         | 0.133 | 0.4 |          |
| 406 | p.Pro504Ser | P475S | rs778204413          | 0.912 | 1.6 |          |
| 407 | p.Pro504Leu | P475L | rs557514021          | 1.000 | 20  |          |
| 408 | p.Pro505Ala | P476A | rs148943954; (7)     | 0.939 | 59  | 147 (4)  |
| 409 | p.Val506Ile | V476I | rs747001287          | 0.480 | 0.8 |          |
| 410 | p.Thr507Ala | T478A | rs1385293426         | 0.001 | 0.7 |          |
| 411 | p.Thr507Ser | T478S | rs1225189746         | 0.004 | 0.7 |          |
| 412 | p.Arg508Gln | R479Q | rs746397573          | 0.999 | 2.0 |          |
| 413 | p.Asn509Asp | N480D | rs769290119          | 0.071 | 0.4 |          |
| 414 | p.Glu510Lys | E481K | rs371544905          | 0.847 | 2.4 |          |
| 415 | p.Thr511Ala | T482A | rs762574298          | 0.027 | 1.6 |          |
| 416 | p.Asp514Asn | D485N | rs201762720          | 1.000 | 4.4 |          |
| 417 | p.Ala515Ser | A486S | rs144294634          | 0.978 | 30  |          |
| 418 | p.His520Asn | H491N | rs767844081          | 0.983 | 2.8 |          |
| 419 | p.His520Arg | H491R | rs1222739179         | 0.963 | 0.7 |          |
| 420 | p.Val521Ile | V492I | rs2049749257         | 0.072 | 0.4 |          |
| 421 | p.Pro522Leu | P493L | rs2049749316         | 0.994 | 6.0 |          |
| 422 | p.Asn523His | N494H | rs1053930450         | 0.705 | 0.8 |          |
| 423 | p.Asn523Ser | N494S | rs1195088899         | 0.121 | 0.7 |          |
| 424 | p.Val524Met | V495M | rs1198635867         | 0.836 | 1.4 |          |
| 425 | p.Val524Ala | V495A | rs12720746           | 0.150 | 4.0 |          |
| 426 | p.Thr525Ile | T496I | rs1251832995         | 0.485 | 0.4 |          |
| 427 | p.Thr525Ala | T496A | rs764244232          | 0.090 | 0.4 |          |
| 428 | p.Pro526Thr | P497S | rs754150700          | 0.997 | 0.7 |          |
| 429 | p.Tyr527Cys | Y498C | rs376323371          | 0.997 | 2.0 |          |
| 430 | p.Ile528Met | I499M | rs2029861083         | 0.898 | 0.4 |          |
| 431 | p.Arg529Ser | R500S | rs368074905          | 0.918 | 1.5 |          |
| 432 | p.Tyr530Cys | Y501C | rs745506888          | 0.999 | 1.2 |          |
| 433 | p.Tyr530His | Y501H | rs2029861365         | 0.942 | 0.4 |          |

Table S2

|     |             |       |                   |       |     |          |
|-----|-------------|-------|-------------------|-------|-----|----------|
| 434 | p.Phe531Cys | F502C | rs551801825       | 1.000 | 0.4 |          |
| 435 | p.Val532Leu | V503L | rs2029861375      | 0.456 | 0.7 |          |
| 436 | p.Phe534Leu | F505L | rs1390757637      | 0.274 | 0.7 |          |
| 437 | p.Val535Ile | V506I | rs1190471425      | 0.097 | 2.1 |          |
| 438 | p.Gln537Arg | Q508R | rs762937072       | 0.919 | 2.4 |          |
| 439 | p.Gln537His | Q508H | rs868856670       | 0.995 | 0.7 |          |
| 440 | p.Phe538Leu | F509L | rs769230286       | 0.963 | 0.4 |          |
| 441 | p.Gln539Lys | Q510K | rs1474365321      | 1.000 | 0.8 |          |
| 442 | p.His541Arg | H512R | rs776858777       | 0.998 | 0.4 |          |
| 443 | p.Glu542Gly | E513G | rs1453609198      | 0.665 | 0.7 |          |
| 444 | p.Ala543Val | A514V | rs765347178       | 0.751 | 0.8 |          |
| 445 | p.Ala543Ser | A514S | rs762055246       | 0.547 | 2.3 |          |
| 446 | p.Gly549Asp | G520D | rs1328713530      | 0.965 | 0.8 |          |
| 447 | p.Tyr550Cys | Y521C | rs753761783       | 0.751 | 1.2 |          |
| 448 | p.Gly552Ser | G523S | rs1339063327      | 0.678 | 0.7 |          |
| 449 | p.Gly552Asp | G523D | rs145152527       | 0.245 | 2.4 |          |
| 450 | p.Leu554Pro | L525P | rs2029861451      | 0.992 | 0.8 |          |
| 451 | p.His555Tyr | H526Y | rs778451287       | 0.721 | 1.2 |          |
| 452 | p.Cys557Arg | C528R | rs1012505443      | 1.000 | 1.9 |          |
| 453 | p.Asp558Asn | D529N | rs2029861470      | 0.878 | 0.4 |          |
| 454 | p.Ile559Val | I530V | rs1205538057      | 0.224 | 0.4 |          |
| 455 | p.Ile559Thr | I530T | rs2029861475      | 0.984 | 6.0 |          |
| 456 | p.Tyr560Cys | Y531C | rs745536540       | 0.996 | 0.4 |          |
| 457 | p.Arg561Trp | R532W | rs4314; (7,20,25) | 0.783 | 78  | 500 (25) |
| 458 | p.Arg561Leu | R532L | rs780299861       | 0.082 | 1.2 |          |
| 459 | p.Ser562Pro | S533P | rs1599142834      | 0.993 | 0.4 |          |
| 460 | p.Thr563Pro | T534P | rs747313119       | 0.047 | 0.4 |          |
| 461 | p.Thr563Ile | T534I | rs769142434       | 0.179 | 16  |          |
| 462 | p.Lys564Glu | K535E | rs1171059871      | 0.002 | 0.7 |          |
| 463 | p.Lys564Thr | K535T | rs1599142842      | 0.025 | 34  | Korean   |
| 464 | p.Ala565Thr | A536T | rs777339023; (26) | 0.976 | 4.8 |          |
| 465 | p.Ala565Val | A536V | rs2029861504      | 0.945 | 0.4 |          |
| 466 | p.Gly566Arg | G537R | rs748643856       | 1.000 | 0.8 |          |
| 467 | p.Gly566Glu | G537E | rs769805183       | 1.000 | 2.4 |          |
| 468 | p.Ala567Val | A538V | rs1422455629      | 0.358 | 20  |          |
| 469 | p.Ala567Thr | A538T | rs1399318948      | 0.059 | 0.4 |          |
| 470 | p.Leu569Val | L540V | rs1318295451      | 0.952 | 0.4 |          |
| 471 | p.Leu569Pro | L540P | rs773305413       | 1.000 | 0.4 |          |
| 472 | p.Arg570Trp | R541W | rs567828872       | 0.983 | 15  |          |
| 473 | p.Arg570Gln | R541Q | rs371599063       | 0.137 | 2.4 |          |
| 474 | p.Lys571Thr | K542T | rs2029862390      | 0.040 | 0.7 |          |
| 475 | p.Lys571Asn | K542N | rs777717910       | 0.096 | 3.6 |          |
| 476 | p.Leu573Pro | L544P | rs1365063879      | 0.999 | 0.8 |          |
| 477 | p.Gln574Lys | Q545K | rs2029862424      | 0.003 | 0.4 |          |
| 478 | p.Gln574Leu | Q545L | rs2029862431      | 0.046 | 0.7 |          |
| 479 | p.Gly576Ala | G547A | rs1243492273      | 0.989 | 0.4 |          |
| 480 | p.Ser577Pro | S548P | rs749450863       | 0.146 | 1.1 |          |
| 481 | p.Ser578Phe | S549F | rs2029862464      | 1.000 | 0.7 |          |
| 482 | p.Pro580Leu | P551L | rs897870088       | 0.805 | 0.8 |          |
| 483 | p.Pro580Thr | P551T | rs759719543       | 0.119 | 2.4 |          |
| 484 | p.Trp581Cys | W552C | rs1337718181      | 1.000 | 0.4 |          |
| 485 | p.Glu583Asp | E554D | rs1198303493      | 0.001 | 0.4 |          |
| 486 | p.Val584Met | V555M | rs2029862514      | 0.985 | 0.4 |          |
| 487 | p.Leu585Pro | L556P | rs776358299       | 0.998 | 0.8 |          |
| 488 | p.Lys586Glu | K557E | rs371414386       | 0.013 | 1.1 |          |

Table S2

|     |             |              |                     |              |            |         |
|-----|-------------|--------------|---------------------|--------------|------------|---------|
| 489 | p.Lys586Arg | K557R        | rs1489606366        | 0.009        | 0.4        |         |
| 490 | p.Asp587Asn | D558N        | rs1182072433        | 0.001        | 0.8        |         |
| 491 | p.Met588Val | M559V        | rs1429588559        | 0.020        | 1.1        |         |
| 492 | p.Met588Thr | M559T        | rs1171932485        | 0.092        | 0.4        |         |
| 493 | p.Gly590Ser | G561S        | rs762585402         | <b>0.898</b> | <b>34</b>  |         |
| 494 | p.Gly590Asp | G561D        | rs1176792351        | <b>0.882</b> | 0.4        |         |
| 495 | p.Asp592Gly | D563G        | rs12709426; (27,28) | 0.047        | <b>382</b> |         |
| 496 | p.Asp592Asn | D563N        | rs1450198005        | 0.022        | 0.4        |         |
| 497 | p.Leu594Pro | L565P        | rs781708329         | <b>0.998</b> | 1.5        |         |
| 498 | p.Asp595Tyr | D566Y        | rs753055168         | <b>0.992</b> | 0.4        |         |
| 499 | p.Ala596Ser | A567S        | rs530248886         | <b>0.562</b> | 0.8        |         |
| 500 | p.Ala596Val | A567V        | rs546796175         | 0.438        | 1.6        |         |
| 501 | p.Pro598Ser | P569S        | rs988156346         | <b>0.522</b> | 0.4        |         |
| 502 | p.Pro598Leu | P569L        | rs759009903         | <b>0.997</b> | 1.6        |         |
| 503 | p.Lys601Glu | K572E        | rs1188841988        | 0.011        | 0.4        |         |
| 504 | p.Lys601Arg | K572R        | rs776418026         | 0.037        | 0.8        |         |
| 505 | p.Phe603Ile | F574I        | rs1178062715        | <b>0.999</b> | 0.4        |         |
| 506 | p.Thr607Asn | T578N        | rs1477242406        | 0.085        | 0.4        |         |
| 507 | p.Gln608Pro | Q579P        | rs1427973166        | <b>0.771</b> | 1.1        |         |
| 508 | p.Trp609Arg | W580R        | rs1430977899        | <b>0.999</b> | 0.4        |         |
| 509 | p.Glu612Ala | E583A        | rs773255356         | <b>0.991</b> | 2.0        |         |
| 510 | p.Asn614Ser | N585S        | rs1568039509        | <b>0.837</b> | 0.4        |         |
| 511 | p.Asn617His | N588H        | rs1455120932        | 0.209        | 0.4        |         |
| 512 | p.Asn617Ser | N588S        | rs372497513         | 0.059        | 0.4        |         |
| 513 | p.Gly618Ser | G589S        | rs111269527         | 0.435        | 2.5        |         |
| 514 | p.Glu619Lys | E590K        | rs375452338         | <b>0.924</b> | 1.6        |         |
| 515 | p.Glu619Ala | E590A        | rs1221968598        | <b>0.696</b> | 0.4        |         |
| 516 | p.Trp623Arg | <b>W594R</b> | (2,10)              | <b>1.000</b> | 0.4        | Low (2) |
| 517 | p.Pro624Arg | P595R        | rs972271442         | 0.246        | 1.1        |         |
| 518 | p.Glu625Lys | E596K        | rs754396876         | <b>0.680</b> | 0.8        |         |
| 519 | p.Y626Asp   | Y597D        | rs757708886         | 0.114        | 2.6        |         |
| 520 | p.Tyr626Ser | Y597S        | rs778975417         | 0.049        | 4.0        |         |
| 521 | p.Trp628Cys | W599C        | rs758471657         | <b>0.994</b> | 1.1        |         |
| 522 | p.His629Pro | H600P        | rs201594771; (7)    | 0.001        | <b>506</b> |         |
| 523 | p.His629Tyr | H600Y        | rs2029862989        | 0.043        | 0.4        |         |
| 524 | p.Pro630Leu | <b>P601L</b> | rs142818229; (4)    | <b>0.988</b> | 4.1        | 154 (4) |
| 525 | p.Pro631Leu | P602L        | rs749271989         | 0.018        | 3.4        |         |
| 526 | p.Asp634Glu | D605E        | rs2029863038        | 0.000        | 6.0        |         |
| 527 | p.Asn635Ser | N606S        | rs774004648         | 0.046        | 1.5        |         |
| 528 | p.Pro637Thr | P608T        | rs759173310         | <b>0.998</b> | 0.4        |         |
| 529 | p.Pro637Leu | P608L        | rs767112824         | <b>0.999</b> | 4.5        |         |
| 530 | p.Glu638Lys | E609K        | rs760201372         | 0.125        | 9.8        |         |
| 531 | p.Gly639Val | G610V        | rs754090770         | 0.410        | 0.8        |         |
| 532 | p.Gly639Ser | <b>G610S</b> | rs72845024; (4)     | 0.007        | 6.1        | 142 (4) |
| 533 | p.Ile640Arg | I611R        | rs1307478617        | <b>0.724</b> | 0.4        |         |
| 534 | p.Asp641Val | D612V        | rs759386648         | 0.012        | 0.4        |         |
| 535 | p.Leu642Val | L613V        | rs2029871862        | 0.396        | 0.7        |         |
| 536 | p.Val643Met | V614M        | rs767279985         | <b>0.449</b> | 0.7        |         |
| 537 | p.Val643Ala | V614A        | rs1317871269        | 0.098        | 0.4        |         |
| 538 | p.Thr644Ser | T615S        | rs752660066         | 0.001        | 1.6        |         |
| 539 | p.Asp645Asn | D616N        | rs763603427         | <b>0.995</b> | 1.4        |         |
| 540 | p.Asp645Ala | D616A        | rs1281544974        | <b>0.995</b> | 1.1        |         |
| 541 | p.Ala649Val | A620V        | rs2029872327        | <b>0.998</b> | 0.7        |         |

Table S2

|     |             |       |                  |              |           |  |
|-----|-------------|-------|------------------|--------------|-----------|--|
| 542 | p.Phe652Tyr | F623Y | rs1393713094     | <b>0.892</b> | 0.7       |  |
| 543 | p.Val653Met | V624M | rs1248095456     | 0.058        | 0.4       |  |
| 544 | p.Glu654Lys | E625K | rs2029872533     | <b>0.565</b> | 0.4       |  |
| 545 | p.Glu655Asp | E626D | rs1487276305     | <b>0.539</b> | 0.4       |  |
| 546 | p.Glu655Lys | E626K | rs1371611657     | <b>0.824</b> | 0.7       |  |
| 547 | p.Tyr656His | Y627H | rs2029872680     | <b>0.994</b> | 6.0       |  |
| 548 | p.Arg658Trp | R629W | rs778684365      | <b>0.581</b> | 0.8       |  |
| 549 | p.Ser660Cys | S631C | rs147429960; (7) | 0.242        | <b>93</b> |  |
| 550 | p.Ser660Ala | S631A | rs2029873057     | 0.000        | 0.4       |  |
| 551 | p.Gln661Leu | Q632L | rs1406304639     | 0.001        | 0.4       |  |
| 552 | p.Gln661His | Q632H | rs2029873234     | 0.004        | 0.4       |  |
| 553 | p.Val662Gly | V633G | rs1379553980     | 0.002        | 0.4       |  |
| 554 | p.Val663Leu | V634L | rs1178170347     | 0.002        | 0.4       |  |
| 555 | p.Glu666Lys | E637K | rs201804955      | 0.313        | <b>33</b> |  |
| 556 | p.Glu666Asp | E637D | rs2029873572     | 0.160        | 0.4       |  |
| 557 | p.Tyr667Cys | Y638C | rs1434646780     | <b>0.938</b> | 0.4       |  |
| 558 | p.Glu669Lys | E640K | rs769228405      | <b>0.813</b> | <b>19</b> |  |
| 559 | p.Glu669Gly | E640G | rs1266247312     | <b>0.921</b> | 0.7       |  |
| 560 | p.Ala670Asp | A641D | rs1177823963     | 0.075        | 0.4       |  |
| 561 | p.Asn671Thr | N642T | rs538715770      | 0.121        | 1.5       |  |
| 562 | p.Asn673Lys | N644K | rs564928656      | 0.005        | 0.4       |  |
| 563 | p.Asn675His | N646H | rs1245129210     | 0.076        | 0.4       |  |
| 564 | p.Ile678Val | I649V | rs371131106      | <b>0.628</b> | 8.4       |  |
| 565 | p.Thr679Ile | T650I | rs532375661      | <b>0.635</b> | 0.4       |  |
| 566 | p.Thr679Ala | T650A | rs771872424      | 0.023        | 0.8       |  |
| 567 | p.Glu681Asp | E652D | rs764154741      | 0.002        | 0.4       |  |
| 568 | p.Thr682Asn | T653N | rs753705010      | 0.000        | 0.8       |  |
| 569 | p.Lys684Asn | K655N | rs1453772021     | 0.003        | 0.4       |  |
| 570 | p.Met691Val | M662V | rs775191459      | 0.000        | 0.4       |  |
| 571 | p.Gln692Lys | Q663K | rs1260448350     | 0.015        | 0.7       |  |
| 572 | p.Ile693Val | I664V | rs2029953456     | 0.000        | 0.8       |  |
| 573 | p.Ala694Thr | A665T | rs764410917      | 0.327        | 0.8       |  |
| 574 | p.Asn695Ser | N666S | rs762256846      | 0.053        | 1.4       |  |
| 575 | p.His696Asn | H667N | rs1187097777     | <b>0.688</b> | 0.4       |  |
| 576 | p.His696Leu | H667L | rs2029954191     | 0.269        | 4.7       |  |
| 577 | p.Thr697Asn | T668N | rs765315607      | <b>0.928</b> | 1.1       |  |
| 578 | p.Gly701Ser | G672S | rs1172339137     | <b>0.999</b> | 3.2       |  |
| 579 | p.Thr702Asn | T673N | rs2029955964     | 0.001        | 0.4       |  |
| 580 | p.Gln703His | Q674H | rs751787326      | 0.089        | 2.6       |  |
| 581 | p.Ala704Val | A675V | rs756018163      | <b>0.663</b> | 0.8       |  |
| 582 | p.Arg705Gly | R676G | rs2029956646     | 0.006        | 0.0       |  |
| 583 | p.Arg705Lys | R676K | rs2029956870     | 0.003        | 0.4       |  |
| 584 | p.Lys706Arg | K677R | rs777673950      | 0.000        | 0.4       |  |
| 585 | p.Asp708Asn | D679N | rs1303374381     | <b>0.990</b> | 0.4       |  |
| 586 | p.Asn710Ser | N681S | rs770923059      | 0.000        | 1.7       |  |
| 587 | p.Gln711His | Q682H | rs2029958548     | 0.000        | 0.4       |  |
| 588 | p.Asn714Lys | N685K | rs778987310      | 0.012        | 0.8       |  |
| 589 | p.Thr716Ala | T687A | rs745422986      | 0.012        | 2.4       |  |
| 590 | p.Ile717Met | I688M | rs771585066      | 0.001        | 0.8       |  |
| 591 | p.Lys718Arg | K689R | rs1316503803     | 0.286        | 0.7       |  |
| 592 | p.Arg719Trp | R690W | rs200649158      | <b>1.000</b> | 5.6       |  |
| 593 | p.Arg719Gln | R690Q | rs371010069; (7) | <b>0.995</b> | 2.4       |  |

Table S2

|     |             |       |                     |              |           |  |
|-----|-------------|-------|---------------------|--------------|-----------|--|
| 594 | p.Ile721Val | I692V | rs769028657         | 0.006        | 0.4       |  |
| 595 | p.Ile721Met | I692M | rs1424703433        | 0.023        | 0.7       |  |
| 596 | p.Lys722Asn | K693N | rs188993222         | 0.123        | 0.8       |  |
| 597 | p.Gln725Glu | Q696E | rs139263584         | 0.393        | 1.2       |  |
| 598 | p.Gln725His | Q696H | rs2029962852        | <b>0.904</b> | 0.8       |  |
| 599 | p.Asp726Val | D697V | rs1420953232        | <b>0.946</b> | 0.4       |  |
| 600 | p.Leu727Arg | L698R | rs2029963533        | <b>0.696</b> | 6.0       |  |
| 601 | p.Arg729Trp | R700W | rs375232467         | <b>1.000</b> | 1.6       |  |
| 602 | p.Arg729Gln | R700Q | rs201527082         | <b>0.994</b> | 2.4       |  |
| 603 | p.Ala730Glu | A701E | rs767880620         | <b>0.999</b> | 8.4       |  |
| 604 | p.Ala730Ser | A701S | rs2029964544        | <b>0.968</b> | 6.0       |  |
| 605 | p.Ala731Val | A702V | rs1374995262        | 0.013        | 7.1       |  |
| 606 | p.Ala734Ser | A705S | rs199785479         | 0.011        | 0.8       |  |
| 607 | p.Leu737Gln | L708Q | rs757100327         | <b>0.999</b> | 0.4       |  |
| 608 | p.Glu738Val | E709V | rs1334538300        | 0.048        | 0.7       |  |
| 609 | p.Asn741Lys | N712K | rs779433192         | <b>0.996</b> | 0.4       |  |
| 610 | p.Lys742Glu | K713E | rs2029992650        | 0.001        | 0.7       |  |
| 611 | p.Lys742Arg | K713R | rs2029992890        | 0.001        | 0.7       |  |
| 612 | p.Ile743Met | I714M | rs1401450584        | <b>0.846</b> | 0.4       |  |
| 613 | p.Met747Thr | M718T | rs2029994732        | <b>0.997</b> | 6.0       |  |
| 614 | p.Glu748Lys | E719K | rs921762904         | <b>0.999</b> | 0.4       |  |
| 615 | p.Glu748Gly | E719G | rs1362206431        | <b>1.000</b> | 0.7       |  |
| 616 | p.Thr749Pro | T720P | rs1599146760        | <b>0.911</b> | 1.4       |  |
| 617 | p.Thr750Ile | T721I | rs2029996149        | 0.005        | 0.7       |  |
| 618 | p.Ser752Ile | S723I | rs2029996374        | <b>0.929</b> | 0.4       |  |
| 619 | p.Val753Met | V724M | rs140129129         | 0.075        | 4.3       |  |
| 620 | p.Ala754Pro | A725P | rs1202344569        | <b>0.943</b> | 0.7       |  |
| 621 | p.Ala754Val | A725V | rs1319509042        | <b>0.830</b> | 1.4       |  |
| 622 | p.Thr755Ile | T726I | rs200503880         | 0.095        | 0.4       |  |
| 623 | p.Thr755Ala | T726A | rs2029998101        | 0.002        | 5.0       |  |
| 624 | p.Val756Leu | V727L | rs773578992         | 0.364        | 0.4       |  |
| 625 | p.Val756Ala | V727A | rs377567489         | <b>0.907</b> | 0.7       |  |
| 626 | p.Cys757Tyr | C728Y | rs1232177858        | <b>0.999</b> | 0.8       |  |
| 627 | p.Pro759Ser | P730S | rs1180603936        | 0.000        | 0.7       |  |
| 628 | p.Pro759Gln | P730Q | rs143843660         | 0.001        | 0.8       |  |
| 629 | p.Cys763Tyr | C734Y | rs370481039         | <b>0.999</b> | 3.6       |  |
| 630 | p.Leu764Gln | L735Q | rs145819052; (7)    | <b>0.662</b> | <b>25</b> |  |
| 631 | p.Glu767Lys | E738K | rs148995315; (7,28) | <b>0.818</b> | <b>26</b> |  |
| 632 | p.Glu767Gly | E738G | rs1421152152        | <b>0.895</b> | 1.4       |  |
| 633 | p.Asp769Gly | D740G | rs559834728         | <b>0.613</b> | 2.4       |  |
| 634 | p.Leu770Val | L741V | rs374146846         | <b>0.994</b> | 1.6       |  |
| 635 | p.Thr771Met | T742M | rs780755664         | <b>0.918</b> | 0.8       |  |
| 636 | p.Val773Met | V744M | rs143830698         | 0.018        | 8.4       |  |
| 637 | p.Met774Val | M745V | rs559585445         | 0.408        | 3.2       |  |
| 638 | p.Thr776Met | T747M | rs769940023         | <b>0.796</b> | 1.1       |  |
| 639 | p.Thr776Ala | T747A | rs199869667         | 0.043        | 2.8       |  |
| 640 | p.Arg778Trp | R749W | rs745724462         | <b>0.988</b> | 2.6       |  |
| 641 | p.Arg778Gln | R749Q | rs771819046         | 0.194        | 2.0       |  |
| 642 | p.Asp782Glu | D753E | rs760477392         | 0.000        | 1.2       |  |
| 643 | p.Leu784Ser | L755S | rs1162307952        | 0.228        | 0.4       |  |
| 644 | p.Trp785Gly | W756G | rs763670346         | <b>0.666</b> | 0.8       |  |
| 645 | p.Glu788Lys | E759K | rs761401927         | 0.002        | 9.2       |  |

Table S2

|     |             |       |                  |              |            |        |
|-----|-------------|-------|------------------|--------------|------------|--------|
| 646 | p.Glu788Asp | E759D | rs565463716      | 0.001        | 1.6        |        |
| 647 | p.Gly789Asp | G760D | rs953051570      | <b>0.618</b> | 0.4        |        |
| 648 | p.Arg791Gln | R762Q | rs755385604      | <b>0.996</b> | 2.0        |        |
| 649 | p.Asp792His | D763H | rs1291650441     | <b>0.868</b> | 0.8        |        |
| 650 | p.Lys793Met | K764M | rs748246753      | 0.324        | 0.8        |        |
| 651 | p.Ala794Thr | A765T | rs756178155      | 0.006        | 0.4        |        |
| 652 | p.Ala794Val | A765V | rs373970727      | 0.003        | 2.8        |        |
| 653 | p.Gly795Arg | G766R | rs2030160089     | <b>1.000</b> | 0.4        |        |
| 654 | p.Arg796Lys | R767K | rs2030160538     | 0.002        | <b>12</b>  |        |
| 655 | p.Ala797Thr | A768T | rs1486364002     | 0.001        | 0.4        |        |
| 656 | p.Ala797Val | A768V | rs1455404812     | 0.003        | 0.4        |        |
| 657 | p.Iso798Val | I769V | rs117647476; (7) | 0.004        | <b>213</b> |        |
| 658 | p.Leu799Phe | L770F | rs2030162108     | <b>0.939</b> | 0.4        |        |
| 659 | p.Leu799Pro | L770P | rs2030162361     | <b>0.939</b> | 1.1        |        |
| 660 | p.Gln800His | Q771H | rs567706604      | 0.003        | 1.2        |        |
| 661 | p.Pro803Leu | P774L | rs367822781      | <b>0.913</b> | 6.4        |        |
| 662 | p.Val806Met | V777M | rs769397961      | <b>1.000</b> | 4.2        |        |
| 663 | p.Leu808Phe | L779F | rs773031583      | 0.087        | 1.4        |        |
| 664 | p.Ile809Val | I780V | rs762647568      | 0.007        | 3.6        |        |
| 665 | p.Asn810Ser | N781S | rs1206246426     | <b>0.995</b> | <b>22</b>  |        |
| 666 | p.Gln811Arg | Q782R | rs1255043434     | 0.017        | 0.7        |        |
| 667 | p.Ala812Val | A783V | rs751806358      | <b>0.533</b> | 0.4        |        |
| 668 | p.Arg814Trp | R785W | rs142799747      | 0.007        | 1.2        |        |
| 669 | p.Arg814Gln | R785Q | rs375979946      | 0.001        | <b>11</b>  |        |
| 670 | p.Leu815Phe | L786F | rs935705219      | <b>0.967</b> | 0.7        |        |
| 671 | p.Asn816Ser | N787S | rs777776998      | <b>0.853</b> | 1.2        |        |
| 672 | p.Tyr818Phe | Y789F | rs369245002      | 0.015        | 2.0        |        |
| 673 | p.Val819Ala | V790A | rs1568043314     | 0.002        | 0.8        |        |
| 674 | p.Asp820Asn | D791N | rs1018632632     | <b>0.784</b> | 1.2        |        |
| 675 | pAla821Val  | A792V | rs781086412      | 0.232        | 0.4        |        |
| 676 | p.Ala821Ser | A792S | rs2030182044     | 0.246        | 0.8        |        |
| 677 | p.Gly822Glu | G793E | rs1340223445     | <b>0.986</b> | 1.1        |        |
| 678 | p.Asp823Asn | D794N | rs995556379      | <b>0.609</b> | 0.4        |        |
| 679 | p.Asp823Val | D794V | rs777851729      | 0.032        | 2.8        |        |
| 680 | p.Ser824Pro | S795P | rs2030184043     | <b>0.870</b> | 0.4        |        |
| 681 | p.Ser827Cys | S798C | rs200757344      | <b>0.864</b> | 0.8        |        |
| 682 | p.Met828Val | M799V | rs890006891      | 0.001        | 0.4        |        |
| 683 | p.Met828Thr | M799T | rs13306091       | 0.072        | 8.0        |        |
| 684 | p.Glu830Lys | E801K | rs267604983      | <b>0.508</b> | 0.8        |        |
| 685 | p.Thr831Ile | T802I | rs777098855      | <b>0.482</b> | 0.4        |        |
| 686 | p.Pro832Leu | P803L | rs761838241      | <b>0.752</b> | 0.4        |        |
| 687 | p.Ser833Phe | S804F | rs1568043397     | 0.006        | 0.4        |        |
| 688 | p.Glu835Gly | E806G | rs2030188578     | <b>0.998</b> | 0.4        |        |
| 689 | p.Gln836Pro | Q807P | rs1599149424     | 0.006        | <b>50</b>  | Korean |
| 690 | p.Leu838Val | L809V | rs2030189487     | 0.073        | 0.4        |        |
| 691 | p.Arg840Trp | R811W | rs3730036; (29)  | <b>0.612</b> | <b>281</b> |        |
| 692 | p.Arg840Gln | R811Q | rs767425642      | 0.002        | 3.2        |        |
| 693 | p.Leu841Phe | L812F | rs2030190997     | 0.293        | 0.4        |        |
| 694 | p.Phe842Ser | F813S | rs537201274      | 0.365        | 0.4        |        |
| 695 | p.Gln843Pro | Q814P | rs1314869920     | 0.239        | 0.8        |        |
| 696 | p.Leu848Val | L819V | rs1263864253     | <b>0.968</b> | 0.8        |        |
| 697 | p.Tyr849Cys | Y820C | rs2030193846     | <b>0.998</b> | 0.4        |        |

Table S2

|     |             |       |                     |       |     |         |
|-----|-------------|-------|---------------------|-------|-----|---------|
| 698 | p.Asn851His | N822H | rs1599149517        | 0.674 | 110 | Korean  |
| 699 | p.His853Tyr | H824Y | rs377172559         | 0.999 | 0.4 |         |
| 700 | p.Ala854Asp | A825D | rs1258657289        | 0.999 | 0.4 |         |
| 701 | p.Ala854Thr | A825T | rs2030195429        | 0.999 | 0.4 |         |
| 702 | p.Tyr855Cys | Y826C | rs1290778035        | 0.997 | 3.0 |         |
| 703 | p.Val856Met | V827M | rs369111551         | 0.936 | 2.8 |         |
| 704 | p.Arg857His | R828H | rs146089353; (2,10) | 1.000 | 3.2 | Low (2) |
| 705 | p.Arg857Cys | R828C | rs989791368         | 1.000 | 0.8 |         |
| 706 | p.Arg858Gln | R829Q | rs765246562         | 0.997 | 12  |         |
| 707 | p.Arg858Trp | R829W | rs762333619         | 1.000 | 1.2 |         |
| 708 | p.Ala859Thr | A830T | rs1474446784        | 0.672 | 0.4 |         |
| 709 | p.Leu860Val | L831V | rs1164595381        | 0.994 | 0.4 |         |
| 710 | p.Leu860Pro | L831P | rs773277069         | 1.000 | 1.7 |         |
| 711 | p.His861Tyr | H832Y | rs140056206; (7)    | 0.006 | 5.6 |         |
| 712 | p.Arg862Cys | R833C | rs751363862         | 0.850 | 1.6 |         |
| 713 | p.Arg862His | R833H | rs756018518         | 0.010 | 3.6 |         |
| 714 | p.Gly865Arg | G836R | rs939884644         | 1.000 | 2.0 |         |
| 715 | p.Ala866Ser | A837S | rs1037068942        | 0.004 | 1.5 |         |
| 716 | p.His868Gln | H839Q | rs753727679         | 0.106 | 0.0 |         |
| 717 | p.Ile869Val | I840V | rs757164151         | 0.013 | 0.8 |         |
| 718 | p.Leu871Gln | L842Q | rs1272138201        | 0.999 | 0.4 |         |
| 719 | p.Pro876Ser | P847S | rs757874491         | 0.999 | 1.2 |         |
| 720 | p.Ala877Gly | A848G | rs931392712         | 0.996 | 0.4 |         |
| 721 | p.His878Gln | H849Q | rs200196657         | 0.985 | 1.2 |         |
| 722 | p.Gly881Glu | G852E | rs1232536510        | 1.000 | 0.8 |         |
| 723 | p.Asn882Ser | N853S | rs771162255         | 0.997 | 0.8 |         |
| 724 | p.Met883Val | M854V | rs774518339         | 0.994 | 0.4 |         |
| 725 | p.Met883Thr | M854T | rs1267969615; (26)  | 1.000 | 0.4 |         |
| 726 | p.Met883Ile | M854L | rs759679121         | 0.996 | 4.1 |         |
| 727 | p.Tyr884Arg | Y855R | rs568842388         | 1.000 | 3.6 |         |
| 728 | p.Ala885Pro | A856P | rs1173972262        | 0.071 | 0.4 |         |
| 729 | p.Ala885Val | A856V | rs1251602237        | 0.803 | 0.4 |         |
| 730 | p.Thr887Ala | T858A | rs1181835738        | 0.157 | 1.1 |         |
| 731 | p.Thr887Asn | T858N | rs761719023         | 0.752 | 0.4 |         |
| 732 | p.Trp888Ser | W859S | rs1468320560        | 1.000 | 0.4 |         |
| 733 | p.Trp888Cys | W859C | rs1157631466        | 1.000 | 0.4 |         |
| 734 | p.Tyr892Cys | Y863C | rs750406199         | 0.993 | 0.4 |         |
| 735 | p.Val895Leu | V866L | rs1393589215        | 0.048 | 0.4 |         |
| 736 | p.Val896Met | V867M | rs145422285         | 0.039 | 0.4 |         |
| 737 | p.Pro899Leu | P870L | rs2030335337        | 0.984 | 0.4 |         |
| 738 | p.Ala901Ser | A872S | rs752266791         | 0.561 | 2.4 |         |
| 739 | p.Ser903Trp | S874W | rs558504919         | 0.429 | 3.4 |         |
| 740 | p.Met904Thr | M875T | rs779560946         | 0.029 | 0.4 |         |
| 741 | p.Asp905Gly | D876G | rs745987517         | 0.973 | 1.1 |         |
| 742 | p.Thr906Ala | T877A | rs1274588146        | 0.000 | 0.7 |         |
| 743 | p.Thr906Ile | T877I | rs772024137         | 0.007 | 0.8 |         |
| 744 | p.Glu908Lys | E879K | rs747159428         | 0.117 | 2.0 |         |
| 745 | p.Ala909Ser | A880S | rs1290624816        | 0.126 | 0.4 |         |
| 746 | p.Lys912Arg | K883R | rs1329922107        | 0.002 | 2.1 |         |
| 747 | p.Gln913Glu | Q884E | rs372614913         | 0.092 | 0.4 |         |
| 748 | p.Gln913Arg | Q884R | rs1026599078        | 0.008 | 2.4 |         |
| 749 | p.Gly914Asp | G885D | rs1362563545        | 0.481 | 0.4 |         |

Table S2

|     |             |       |                      |       |     |        |
|-----|-------------|-------|----------------------|-------|-----|--------|
| 750 | p.Trp915Ser | W886S | rs1271898535         | 0.989 | 0.7 |        |
| 751 | p.Thr916Ala | T887A | rs755053417          | 0.422 | 0.4 |        |
| 752 | p.Thr916Met | T887M | rs3730043; (7,26,28) | 0.969 | 397 |        |
| 753 | p.Pro917Ala | P888A | rs748317639          | 0.070 | 0.4 |        |
| 754 | p.Pro917Arg | P888R | rs770741758          | 0.989 | 0.8 |        |
| 755 | p.Met920Thr | M891T | rs745827618          | 0.948 | 0.4 |        |
| 756 | p.Lys922Glu | K893E | rs551723440          | 0.000 | 0.4 |        |
| 757 | p.Ser930Phe | S901F | rs1231385013         | 1.000 | 0.4 |        |
| 758 | p.Leu931Pro | L902P | rs1317192622         | 1.000 | 0.4 |        |
| 759 | p.Gly932Arg | G903R | rs1335323894         | 1.000 | 2.1 |        |
| 760 | p.Gly932Ala | G903A | rs768235439          | 0.998 | 0.4 |        |
| 761 | p.Pro935Ser | P906S | rs199555061          | 0.922 | 1.2 |        |
| 762 | p.Pro935Leu | P906L | rs537884559          | 0.984 | 8.0 |        |
| 763 | p.Val936Met | V907M | rs752081336          | 0.036 | 2.4 |        |
| 764 | p.Glu939Gln | E910Q | rs755034079          | 0.382 | 0.7 |        |
| 765 | p.Trp941Arg | W912R | rs375020796          | 1.000 | 0.4 |        |
| 766 | p.Trp941Cys | W912C | rs1202055050         | 0.999 | 0.4 |        |
| 767 | p.Asn942His | N913H | rs1290388486         | 0.000 | 0.4 |        |
| 768 | p.Asn942Lys | N913K | rs201517271          | 0.003 | 0.4 |        |
| 769 | p.Asn942Ser | N913S | rs2030363936         | 0.000 | 0.4 |        |
| 770 | p.Lys943Arg | K914R | rs777955033          | 0.492 | 0.8 |        |
| 771 | p.Lys943Asn | K914N | rs1456982290         | 0.724 | 0.4 |        |
| 772 | p.Leu946Val | L917V | rs1397259349         | 0.198 | 0.4 |        |
| 773 | p.Glu947Lys | E918K | rs201076681          | 0.902 | 1.6 |        |
| 774 | p.Pro949Ser | P920S | rs779881202          | 0.999 | 0.4 |        |
| 775 | p.Asp951Tyr | D922Y | rs776223808          | 0.992 | 0.8 |        |
| 776 | p.Gly952Arg | G923R | rs987787902          | 0.993 | 3.0 |        |
| 777 | p.Arg953Trp | R924W | rs772888815          | 1.000 | 1.2 |        |
| 778 | p.Cys957Arg | C928R | rs759966983          | 0.999 | 0.4 |        |
| 779 | p.Cys957Ser | C928S | rs767594429          | 0.994 | 0.4 |        |
| 780 | p.Ala959Thr | A930T | rs756159839          | 0.810 | 0.8 |        |
| 781 | p.Ala959Asp | A930D | rs764275894          | 0.890 | 0.8 |        |
| 782 | p.Ser960Leu | S931L | rs1420430019         | 0.999 | 1.6 |        |
| 783 | p.Ala961Pro | A932P | rs779833433          | 0.999 | 2.8 |        |
| 784 | p.Asn966Asp | N937D | rs746934582          | 0.997 | 0.4 |        |
| 785 | p.Gly967Ser | G938S | rs937878555          | 0.967 | 1.6 |        |
| 786 | p.Asp969Tyr | D940Y | rs913463914          | 0.999 | 2.1 |        |
| 787 | p.Phe970Cys | F941C | rs2030374256         | 1.000 | 0.4 |        |
| 788 | p.Arg971Trp | R942W | rs769406157          | 1.000 | 2.4 |        |
| 789 | p.Arg971Gln | R942Q | rs554004241          | 0.998 | 8.0 |        |
| 790 | p.Ile972Val | I943V | rs2030513571         | 0.970 | 0.8 |        |
| 791 | p.Ile972Thr | I943T | rs2030513778         | 0.999 | 0.4 |        |
| 792 | p.Gln974Arg | Q945R | rs375442845          | 0.995 | 0.4 |        |
| 793 | p.Cys975Gly | C946G | rs1318768216         | 1.000 | 0.4 |        |
| 794 | p.Cys975Tyr | C946Y | rs1346738730         | 1.000 | 0.4 |        |
| 795 | p.Thr977Ile | T948I | rs1439040577         | 0.006 | 1.1 |        |
| 796 | p.Val978Met | V949M | rs141750591          | 0.993 | 26  |        |
| 797 | p.Leu980Ser | L951S | rs2030516614         | 0.266 | 0.4 |        |
| 798 | p.Val985Met | V956M | rs2030518300         | 0.568 | 0.7 |        |
| 799 | p.Ala986Pro | A957P | rs1218838386         | 0.492 | 330 | Korean |
| 800 | p.His987Tyr | H958Y | rs1285477249         | 0.999 | 1.2 |        |
| 801 | p.His988Arg | H959R | rs1315238107         | 0.792 | 0.4 |        |

Table S2

|     |              |        |                     |       |     |  |
|-----|--------------|--------|---------------------|-------|-----|--|
| 802 | p.Glu989Lys  | E960K  | rs752685131         | 1.000 | 1.2 |  |
| 803 | p.Met990Arg  | M961M  | rs1468555557        | 0.601 | 0.4 |  |
| 804 | p.Met990Ile  | M961I  | rs1227030637        | 0.005 | 0.8 |  |
| 805 | p.Gly991Ser  | G962S  | rs756019276         | 1.000 | 0.4 |  |
| 806 | p.His992Asp  | H963D  | rs1244440863        | 1.000 | 1.2 |  |
| 807 | p.His992Arg  | H963R  | rs771384705         | 0.999 | 0.8 |  |
| 808 | p.Ile993Val  | I964V  | rs753450698         | 0.003 | 1.4 |  |
| 809 | p.Gln994Arg  | Q965R  | rs2030522217        | 0.995 | 0.4 |  |
| 810 | p.Tyr995His  | Y966H  | rs778562737         | 0.999 | 0.4 |  |
| 811 | p.Phe996Ser  | F967S  | rs2030522633        | 0.997 | 0.7 |  |
| 812 | p.Met997Val  | M968V  | rs745486055         | 0.341 | 1.1 |  |
| 813 | p.Met997Ile  | M968I  | rs1395070641        | 0.341 | 0.4 |  |
| 814 | p.Gln998Lys  | Q969K  | rs772433710         | 0.991 | 0.4 |  |
| 815 | p.Tyr999Cys  | Y970C  | rs1325658187        | 1.000 | 0.4 |  |
| 816 | p.Pro1003Leu | P974L  | rs377280373         | 0.909 | 2.4 |  |
| 817 | p.Arg1007Lys | R978K  | rs747362596         | 0.999 | 0.4 |  |
| 818 | p.Gly1009Val | G980V  | rs769272334         | 0.994 | 2.9 |  |
| 819 | p.Ala1010Gly | A981G  | rs1740970700        | 0.992 | 0.7 |  |
| 820 | p.Gly1013Ser | G984S  | rs571848794; (7,26) | 1.000 | 6.8 |  |
| 821 | p.Gly1013Ala | G984A  | rs540734174         | 1.000 | 0.8 |  |
| 822 | p.His1015Tyr | H986Y  | rs2030527371        | 0.999 | 0.4 |  |
| 823 | p.His1015Arg | H986R  | rs773600140         | 0.999 | 1.6 |  |
| 824 | p.His1015Gln | H986Q  | rs144751624         | 0.999 | 19  |  |
| 825 | p.Glu1016Gly | E987G  | rs2030528115        | 1.000 | 0.4 |  |
| 826 | p.Ala1017Thr | A988T  | rs1471502216        | 0.999 | 0.4 |  |
| 827 | p.Ile1018Val | I989V  | rs2030528735        | 0.215 | 0.7 |  |
| 828 | p.Ile1018Thr | I989T  | rs4976; (7)         | 0.988 | 143 |  |
| 829 | p.Gly1019Arg | G990R  | rs1418273122        | 1.000 | 0.4 |  |
| 830 | p.Asp1020Gly | D991G  | rs1200211350        | 1.000 | 3.2 |  |
| 831 | p.Val1021Met | V992M  | rs764129854         | 0.977 | 3.2 |  |
| 832 | p.Leu1024Phe | L995F  | rs753672462         | 1.000 | 1.6 |  |
| 833 | p.Ser1025Ala | S996A  | rs1489092015        | 0.997 | 0.7 |  |
| 834 | p.Val1026Met | V997M  | rs377550847         | 0.998 | 1.2 |  |
| 835 | p.Val1026Ala | V997A  | rs1372691116        | 0.886 | 0.4 |  |
| 836 | p.Ser1027Cys | S998C  | rs2030532177        | 0.980 | 0.7 |  |
| 837 | p.Thr1028Met | T999M  | rs778331848         | 1.000 | 2.9 |  |
| 838 | p.Pro1029Ser | P1000S | rs758105347         | 0.999 | 0.4 |  |
| 839 | p.Lys1030Asn | K1001N | rs374679629         | 0.561 | 1.2 |  |
| 840 | p.His1033Pro | H1004P | rs747442787         | 0.437 | 0.8 |  |
| 841 | p.Asp1036Lys | N1007K | rs142947404; (7,28) | 0.041 | 71  |  |
| 842 | p.Leu1037Pro | L1008P | rs1258035065        | 1.000 | 0.4 |  |
| 843 | p.Ser1039Asn | S1010N | rs1368193999        | 0.011 | 0.8 |  |
| 844 | p.Ser1039Arg | S1010R | rs2030536211        | 0.034 | 0.4 |  |
| 845 | p.Ser1040Thr | S1011T | rs749362077         | 0.000 | 0.4 |  |
| 846 | p.Glu1041Asp | E1012D | rs771342124         | 0.000 | 1.1 |  |
| 847 | p.Gly1043Ser | G1014S | rs2030536853        | 0.001 | 0.7 |  |
| 848 | p.Gly1043Val | G1014V | rs1599154510        | 0.002 | 0.7 |  |
| 849 | p.Asp1045His | D1016H | rs140980792         | 0.001 | 4.8 |  |
| 850 | p.Asp1045Glu | D1016E | rs200011052         | 0.000 | 0.8 |  |
| 851 | p.Glu1046Lys | E1017K | rs761601299         | 0.996 | 0.4 |  |
| 852 | p.Asp1048Gly | D1019G | rs1313627969        | 0.509 | 0.8 |  |
| 853 | p.Ile1049Val | I1020V | rs765835019         | 0.984 | 0.8 |  |

Table S2

|     |              |         |                     |       |     |         |
|-----|--------------|---------|---------------------|-------|-----|---------|
| 854 | p.Asn1050Asp | N1021D  | rs751226904         | 0.998 | 0.4 |         |
| 855 | p.Asn1050Ser | N1021S  | rs935304784         | 0.994 | 1.5 |         |
| 856 | p.Leu1052Val | L1023V  | rs989584821         | 0.988 | 0.4 |         |
| 857 | p.Leu1052Pro | L1023PV | rs1351048530        | 1.000 | 0.4 |         |
| 858 | p.Met1055Leu | M1026L  | rs144926742         | 0.065 | 4.4 |         |
| 859 | p.Met1055Thr | M1026T  | rs1568046795        | 0.962 | 0.4 |         |
| 860 | p.Met1055Iso | M1026I  | rs767184799         | 0.017 | 0.4 |         |
| 861 | p.Ala1056Thr | A1027T  | rs569898686         | 0.999 | 0.4 |         |
| 862 | p.Asp1058Asn | D1029N  | rs1197014458        | 0.830 | 0.4 |         |
| 863 | p.Asp1058Gly | D1029G  | rs1458584759        | 0.916 | 0.7 |         |
| 864 | p.Iso1060Val | I1031V  | rs1458035301        | 0.021 | 1.6 |         |
| 865 | p.Ala1061Thr | A1032T  | rs773695336         | 0.057 | 4.2 |         |
| 866 | p.Phe1062Leu | F1033L  | rs778802598         | 0.998 | 0.8 |         |
| 867 | p.Pro1064Leu | P1035L  | rs1384728709        | 0.671 | 1.5 |         |
| 868 | p.Tyr1067His | Y1038H  | rs1342469069        | 0.990 | 1.1 |         |
| 869 | p.Tyr1067Cys | Y1038C  | rs1382876528        | 0.992 | 0.7 |         |
| 870 | p.Val1069Iso | V1040I  | rs147763588         | 0.002 | 2.4 |         |
| 871 | p.Val1069Ala | V1040A  | rs1322398043        | 0.422 | 3.2 |         |
| 872 | p.Asp1070Asn | D1041N  | rs571910640         | 1.000 | 4.0 |         |
| 873 | p.Gln1071Lys | Q1042K  | rs769531227         | 0.444 | 0.4 |         |
| 874 | p.Arg1073Cys | R1044C  | rs762807750         | 1.000 | 1.6 |         |
| 875 | p.Arg1073His | R1044H  | rs141139841         | 0.999 | 0.8 |         |
| 876 | p.Val1076Leu | V1047L  | rs534480370         | 0.995 | 17  |         |
| 877 | p.Asp1078Asn | D1049N  | rs2030566841        | 0.338 | 18  | Japan   |
| 878 | p.Asp1078Gly | D1049G  | rs375039288         | 0.946 | 2.4 |         |
| 879 | p.Gly1079Glu | G1050E  | rs752369560         | 0.856 | 0.8 |         |
| 880 | p.Ser1080Cys | S1051C  | rs1472584106        | 0.778 | 0.4 |         |
| 881 | p.Ser1080Asn | S1051N  | rs1166034708        | 0.111 | 0.8 |         |
| 882 | p.Iso1081Val | I1052V  | rs761139845         | 0.014 | 0.8 |         |
| 883 | p.Iso1081Asn | I1052N  | rs2030568517        | 0.994 | 0.4 |         |
| 884 | p.Glu1084Lys | E1055K  | rs1455896148        | 0.012 | 0.8 |         |
| 885 | p.Glu1084Asp | E1055D  | rs2030568933        | 0.001 | 0.4 |         |
| 886 | p.Gln1088His | Q1059H  | rs764489358         | 0.874 | 0.8 |         |
| 887 | p.Trp1091Arg | W1062R  | rs2030569963        | 1.000 | 0.7 |         |
| 888 | p.Ser1092Gly | S1063G  | rs2030570388        | 0.082 | 0.7 |         |
| 889 | p.Arg1094Gly | R1065G  | rs754412363         | 1.000 | 1.2 |         |
| 890 | p.Gln1098Arg | Q1069R  | rs 1568047250; (30) | 1.000 | 1.6 | 36 (30) |
| 891 | p.Pro1102Thr | P1073T  | rs145349565         | 0.989 | 69  |         |
| 892 | p.Pro1103Thr | P1074T  | rs745776314         | 1.000 | 5.6 |         |
| 893 | p.Val1104Ala | V1075A  | rs1458829834        | 0.040 | 0.7 |         |
| 894 | p.Arg1106Ser | R1077S  | rs2030598589        | 1.000 | 0.4 |         |
| 895 | p.Gln1108Arg | Q1079R  | rs2030599332        | 0.006 | 0.7 |         |
| 896 | p.Gly1109Val | G1080V  | rs768468260         | 0.476 | 0.7 |         |
| 897 | p.Phe1111Leu | F1082L  | rs1465879181        | 0.996 | 0.4 |         |
| 898 | p.Asp1112Gly | D1083G  | rs1568047328        | 1.000 | 0.4 |         |
| 899 | p.Asp1112Glu | D1083E  | rs762107963         | 0.994 | 0.8 |         |
| 900 | p.Ala1115Asp | A1086D  | rs565263717         | 0.887 | 0.8 |         |
| 901 | p.His1118Tyr | H1089Y  | rs1192509168        | 0.999 | 0.4 |         |
| 902 | p.Val1123Met | V1094M  | rs373319603         | 0.987 | 1.2 |         |
| 903 | p.Pro1124Thr | P1096T  | rs1455545095        | 1.000 | 0.4 |         |
| 904 | p.Iso1126Leu | I1097L  | rs567659245         | 0.022 | 11  |         |
| 905 | p.Iso1126Ser | I1097S  | rs2030603816        | 0.974 | 0.4 |         |

Table S2

|     |              |        |                   |       |     |  |
|-----|--------------|--------|-------------------|-------|-----|--|
| 906 | p.Arg1127Ser | R1098S | rs1229959665      | 0.999 | 0.7 |  |
| 907 | p.Tyr1128Cys | Y1099C | rs1481913226      | 1.000 | 0.4 |  |
| 908 | p.Val1130Iso | V1101I | rs575830312       | 0.031 | 2.4 |  |
| 909 | p.Val1130Ala | V1101A | rs2030731929      | 0.877 | 0.4 |  |
| 910 | p.Ser1131Pro | S1102P | rs777258874       | 0.998 | 0.4 |  |
| 911 | p.Ser1131Gly | S1102G | rs2030732506      | 0.091 | 0.8 |  |
| 912 | p.Phe1132Leu | F1123L | rs1308790992      | 0.997 | 0.8 |  |
| 913 | p.Gln1135Lys | Q1106K | rs749711522; (26) | 0.995 | 4.0 |  |
| 914 | p.Gln1135Arg | Q1106R | rs771232505       | 0.998 | 0.4 |  |
| 915 | p.Gln1137Arg | Q1108R | rs1895643705      | 1.000 | 0.4 |  |
| 916 | p.His1139Tyr | H1110Y | rs1281978641      | 0.993 | 0.8 |  |
| 917 | p.Glu1140Lys | E1111K | rs1228691156      | 0.011 | 1.2 |  |
| 918 | p.Gln1144Pro | Q1115P | rs775709106       | 0.063 | 0.4 |  |
| 919 | p.Ala1145Val | A1116V | rs1444132860      | 0.032 | 0.4 |  |
| 920 | p.Ala1146Pro | A1117P | rs2030736169      | 0.998 | 0.4 |  |
| 921 | p.His1148Tyr | H1119Y | rs1246627721      | 0.900 | 0.7 |  |
| 922 | p.Thr1149Met | T1120M | rs764430271       | 0.439 | 3.2 |  |
| 923 | p.Gly1150Ala | G1121A | rs762872915       | 0.439 | 1.2 |  |
| 924 | p.Pro1151Leu | P1122L | rs1460629643      | 0.680 | 0.7 |  |
| 925 | p.His1153Gln | H1124Q | rs1167765854      | 0.899 | 0.4 |  |
| 926 | p.Cys1155Tyr | C1126Y | rs1319412351      | 0.999 | 1.9 |  |
| 927 | p.Asp1156Arg | D1127R | rs751557067       | 0.998 | 0.4 |  |
| 928 | p.Ile1157Thr | I1128T | rs1215104945      | 0.999 | 2.4 |  |
| 929 | p.Ser1160Phe | S1131F | rs1435131111      | 1.000 | 0.4 |  |
| 930 | p.Glu1162Asp | E1133D | rs2030740252      | 0.006 | 0.4 |  |
| 931 | p.Ala1163Ser | A1134S | rs1299150514      | 0.998 | 1.2 |  |
| 932 | p.Gly1164Arg | G1135R | rs145579007       | 1.000 | 10  |  |
| 933 | p.Arg1166Cys | R1137C | rs777499791       | 0.456 | 1.2 |  |
| 934 | p.Arg1166His | R1137H | rs201126192       | 0.273 | 8.0 |  |
| 935 | p.Leu1167Val | L1138V | rs1227093005      | 0.994 | 1.4 |  |
| 936 | p.Leu1167Pro | L1138P | rs2030743196      | 1.000 | 0.4 |  |
| 937 | p.Ala1168Thr | A1139T | rs771285769       | 0.439 | 0.4 |  |
| 938 | p.Ala1168Val | A1139V | rs993733529       | 0.647 | 0.7 |  |
| 939 | p.Ala1170Thr | A1141T | rs747412511       | 0.756 | 0.8 |  |
| 940 | p.Ala1170Val | A1141V | rs2030766252      | 0.058 | 0,7 |  |
| 941 | p.Met1171Leu | M1142L | rs776634959       | 0.018 | 0.4 |  |
| 942 | p.Gly1174Asp | G1145D | rs1458534207      | 1.000 | 1.1 |  |
| 943 | p.Arg1177Ser | R1177S | rs1385800001      | 0.036 | 0.8 |  |
| 944 | p.Pro1178Leu | P1149L | rs538659872       | 0.836 | 1.6 |  |
| 945 | p.Pro1180Ala | P1151A | rs767177049       | 0.995 | 2.0 |  |
| 946 | p.Pro1180Leu | P1151L | rs775501006       | 1.000 | 5.6 |  |
| 947 | p.Met1183Val | M1154V | rs376826294       | 0.957 | 0.8 |  |
| 948 | p.Met1183Thr | M1154T | rs753388395       | 0.634 | 0.4 |  |
| 949 | p.Met1183Ile | M1154I | rs756739847       | 0.998 | 0.4 |  |
| 950 | p.Iso1186Met | I1157M | rs764893306       | 0.059 | 0.8 |  |
| 951 | p.Thr1187Met | T1158M | rs12709442        | 1.000 | 76  |  |
| 952 | p.Gln1189Arg | Q1160R | rs1210452594      | 0.995 | 0.8 |  |

Table S2

|     |              |        |                      |       |                  |             |
|-----|--------------|--------|----------------------|-------|------------------|-------------|
| 953 | p.Pro1190Ser | P1161S | rs1295931503         | 0.028 | 1.9              |             |
| 954 | p.Pro1190Leu | P1161L | rs1264163829         | 0.663 | 0.7              |             |
| 955 | p.Met1192Val | M1163V | rs2030771924         | 0.654 | 6.0              |             |
| 956 | p.Ser1193Asn | S1164N | rs780228220          | 0.996 | 1.6              |             |
| 957 | p.Ala1194Thr | A1165T | rs755506668          | 0.898 | 0.8              |             |
| 958 | p.Ala1194Asp | A1165D | rs777388821          | 0.982 | 0.4              |             |
| 959 | p.Ser1195Pro | S1166P | rs1343107612         | 0.092 | 0.4              |             |
| 960 | p.Ser1195Leu | S1166L | rs748284095          | 0.004 | 2.4              |             |
| 961 | p.Ala1196Thr | A1167T | rs773596097          | 0.433 | 0.4              |             |
| 962 | p.Met1197Val | M1168V | rs201870045          | 0.016 | 1.2              |             |
| 963 | p.Phe1201Leu | F1172L | rs775204602          | 0.998 | 0.4              |             |
| 964 | p.Pro1203Leu | P1174L | rs369760270          | 1.000 | 1.6              |             |
| 965 | p.Asp1206Tyr | D1177Y | rs2030775874         | 0.871 | 0.4              |             |
| 966 | p.Asp1206Ala | D1177A | rs1291258688         | 0.164 | 0.8              |             |
| 967 | p.Arg1209Pro | R1180P | rs5381166970; (2,10) | 0.358 | 1.6              | 203* (10)   |
| 968 | p.Arg1209His | R1180H |                      | 0.240 |                  |             |
| 969 | p.Arg1209Cys | R1180C | rs1353694784         | 0.414 | 0.8              |             |
| 970 | p.Thr1210Met | T1181M | rs12720742           | 0.421 | 106              |             |
| 971 | p.Glu1211Lys | E1182K | rs766053859          | 0.116 | 0.9              |             |
| 972 | p.Glu1211Val | E1182V | rs1568049110         | 0.880 | 0.4              |             |
| 973 | p.Asn1212Asp | N1183D | rs996589954          | 0.999 | 1.4              |             |
| 974 | p.Asn1212Thr | N1183T | rs574717474          | 1.000 | 2.4              |             |
| 975 | p.Glu1213Lys | E1184K | rs149590791          | 0.001 | 0.4              |             |
| 976 | p.Glu1213Ala | E1184A | rs2030780027         | 0.001 | 0.7              |             |
| 977 | p.Leu1214Pro | L1185P | rs1451027689         | 0.058 | 1.1              |             |
| 978 | p.His1215Arg | H1186R | rs757974064          | 0.040 | 0.4              |             |
| 979 | p.His1215Gln | H1186Q | rs144312383          | 0.003 | 6.0              |             |
| 980 | p.Gly1216Arg | G1187R | rs2030781426         | 0.699 | 0.4              |             |
| 981 | p.Glu1217Asp | E1188S | rs1248102885         | 0.048 | 0.4              |             |
| 982 | p.Lys1218Gln | K1189Q | rs2030782089         | 0.001 | 0.4              |             |
| 983 | p.Lys1218Arg | K1189R | ss2030782285         | 0.023 | 0.4              |             |
| 984 | p.Leu1219Pro | L1190P | rs140941300          | 0.989 | 4.7              |             |
| 985 | p.Gly1220Ser | G1191S | rs1418538736         | 1.000 | 0.4              |             |
| 986 | p.Pro1222Ser | P1193S | rs144888208          | 0.999 | 0.4              |             |
| 987 | p.Pro1222Leu | P1193L | rs779175881          | 1.000 | 2.4              |             |
| 988 | p.Tyr1224His | Y1195H | rs776554544          | 0.962 | 0.4              |             |
| 989 | p.Asn1225Lys | N1196K | rs1033103629; (15)   | 0.137 | 2.4              | 434 (15)    |
| 990 | p.Asn1225Thr | N1196T | rs761685671          | 0.001 | 0.4              |             |
| 991 | p.Trp1226Cys | W1197C | rs769710002          | 1.000 | 0.4              |             |
| 992 | p.Thr1227Ala | T1198A | rs772778762          | 0.000 | 0.8              |             |
| 993 | p.Thr1227Met | T1198M | rs762495578          | 0.010 | 4.5              |             |
| 994 | p.Pro1228Leu | P1199L | rs121912703; (31)    | 1.000 | 3.7 <sup>d</sup> | 425 (14,31) |
| 995 | p.Asn1229Ser | N1200S | rs753269825          | 0.000 | 0.4              |             |
| 996 | p.Ser1230Tyr | S1201Y | rs756742824          | 0.372 | 2.9              |             |
| 997 | p.Ala1231Thr | A1202T | rs959741765          | 0.183 | 0.4              |             |
| 998 | p.Arg1232Cys | R1203C | rs750545791          | 0.265 | 1.1              |             |

Table S2

|      |              |               |                  |              |            |        |
|------|--------------|---------------|------------------|--------------|------------|--------|
| 999  | p.Arg1232His | R1203H        | rs372282664; (7) | 0.001        | 6.9        |        |
| 1000 | p.Ser1233Leu | S1204L        | rs1474601688     | 0.001        | 6.0        |        |
| 1001 | p.Pro1236Leu | P1207L        | rs751737727      | 0.001        | 0.4        |        |
| 1002 | p.Asp1239Gly | D1210G        | rs777561376      | 0.000        | 0.9        |        |
| 1003 | p.Asp1239Glu | D1210E        | rs749019292      | 0.000        | 0.4        |        |
| 1004 | p.Gly1241Ser | G1212S        | rs367916721      | 0.003        | <b>38</b>  |        |
| 1005 | p.Arg1242Cys | R1213C        | rs1226490350     | <b>0.446</b> | 1.4        |        |
| 1006 | p.Arg1242His | R1213H        | rs781198085      | 0.374        | 3.5        |        |
| 1007 | p.Val243Ile  | V1214I        | rs372416620      | 0.279        | 5.6        |        |
| 1008 | p.Phe1245Leu | F1216L        | rs521181910      | 0.039        | 0.4        |        |
| 1009 | p.Gly1247Val | G1218V        | rs2030812434     | <b>0.976</b> | 0.4        |        |
| 1010 | p.Asp1249Ala | D1220A        | rs777124668      | 0.001        | 0.4        |        |
| 1011 | p.Leu1250Val | L1221V        | rs1193002337     | 0.034        | 0.4        |        |
| 1012 | p.Ala1252Val | A1223V        | rs762056936      | 0.007        | 0.4        |        |
| 1013 | p.Arg1256Cys | R1227C        | rs763049172      | 0.353        | <b>32</b>  |        |
| 1014 | p.Arg1256His | R1227H        | rs766377685      | 0.001        | 1.8        |        |
| 1015 | p.Val1257Met | V1228M        | rs759857038      | 0.016        | 0.5        |        |
| 1016 | p.Gly1258Ser | G1229S        | rs1347084405     | 0.341        | 0.5        |        |
| 1017 | p.Gly1258Asp | G1229D        | rs1434928128     | <b>0.888</b> | 0.8        |        |
| 1018 | p.Gln1259Pro | Q1230P        | rs756978461      | <b>0.497</b> | 0.5        |        |
| 1019 | p.Gly1266Asp | G1237S        | rs778929965      | 0.075        | 5.3        |        |
| 1020 | p.Ala1268Thr | A1239T        | rs757997489      | 0.005        | 3.4        |        |
| 1021 | p.Leu1270Pro | L1241P        | rs1179455074     | 0.024        | 0.8        |        |
| 1022 | p.Val1271I   | V1242I        | rs780690514      | 0.003        | 0.4        |        |
| 1023 | p.Ala1272Thr | A1243T        | rs1425238764     | 0.029        | 0.8        |        |
| 1024 | p.Ala1272Gly | A1243G        | rs770016471      | <b>0.530</b> | 1.4        |        |
| 1025 | p.Arg1279Gln | <b>R1250Q</b> | rs4980; (7, 28)  | <b>0.002</b> | <b>410</b> | 85 (4) |
| 1026 | p.Arg1279Trp | R1250W        | rs568401628      | <b>0.451</b> | 4.5        |        |
| 1027 | p.Phe1281Ser | F1252S        | rs1393052928     | 0.004        | 0.7        |        |
| 1028 | p.Iso1283Val | I1254V        | rs1268051765     | 0.011        | 0.8        |        |
| 1029 | p.Arg1284Cys | R1255C        | rs375527470; (7) | 0.353        | 5.4        |        |
| 1030 | p.Arg1284His | R1255H        | rs1333987355     | 0.001        | 0.7        |        |
| 1031 | p.Arg1286Ser | R1257S        | rs4364; (20,28)  | 0.013        | <b>733</b> |        |
| 1032 | p.Arg1286Cys | R1257C        |                  | <b>0.733</b> |            |        |
| 1033 | p.Arg1286His | R1257H        | rs767828019      | 0.000        | <b>17</b>  |        |
| 1034 | p.Leu1288Phe | L1259F        | rs2030824754     | 0.008        | 0.4        |        |
| 1035 | p.His1289Arg | H1260R        | rs1004296792     | 0.000        | 1.1        |        |
| 1036 | p.Arg1290Trp | R1261W        | rs752812293      | 0.000        | <b>42</b>  |        |
| 1037 | p.Arg1290Gln | R1261Q        | rs12720745       | 0.000        | <b>622</b> |        |
| 1038 | p.His1291Pro | H1262P        | rs2030827530     | 0.000        | 0.4        |        |
| 1039 | p.His1293Tyr | H1264Y        | rs765069550      | 0.027        | 6.0        |        |
| 1040 | p.His1293Gln | H1264Q        | rs1013454628     | 0.001        | 4.0        |        |
| 1041 | p.Gly1294Arg | G1265R        | rs1422356094     | 0.006        | 0.4        |        |
| 1042 | p.Gly1294Glu | G1265E        | rs2030827530     | 0.004        | 0.7        |        |
| 1043 | p.Pro1295Leu | P1266L        | rs886053226      | <b>0.466</b> | 0.8        |        |
| 1044 | p.Gln1296Arg | Q1267R        | rs4961           | 0.001        | 0.7        |        |

Table S2

|                                                         |              |        |              |              |     |               |
|---------------------------------------------------------|--------------|--------|--------------|--------------|-----|---------------|
| 1045                                                    | p.Gly1298Cys | G1269C | rs1024799181 | 0.009        | 2.9 |               |
| 1046                                                    | p.Glu1300Lys | E1271K | rs751134637  | 0.313        | 2.8 |               |
| 1047                                                    | p.Glu1300Gly | E1271G | rs1385347177 | <b>0.725</b> | 0.7 |               |
| 1048                                                    | p.Glu1300Asp | E1271D | rs1244045213 | <b>0.453</b> | 0.8 |               |
| <b>III. □ Combined frequency</b>                        |              |        |              |              |     |               |
|                                                         |              |        |              |              |     |               |
| <b>Probably damaging (red)</b>                          |              |        |              |              |     | <b>3,854</b>  |
| <b>Possibly damaging (violet)</b>                       |              |        |              |              |     | <b>1,700</b>  |
| <b>Probably damaging and possibly damaging combined</b> |              |        |              |              |     | <b>5,554</b>  |
| <b>Benign</b>                                           |              |        |              |              |     | <b>4,871</b>  |
| <b>All (MAF)</b>                                        |              |        |              |              |     | <b>10,425</b> |

Name of the ACE mutations (column C) , that were already phenotyped for blood ACE levels (column G), were marked with **red**.

<sup>a</sup> Japanese; <sup>b</sup> Mutations, eliminating transmembrane anchor, i.e. increasing (>10-fold) blood ACE, and thus, decreasing tissue ACE; <sup>c</sup> mostly African; <sup>d</sup> much more frequent in Netherlands [18];

Frequency of mutations ( MAF, column 6): >10-**bold**, >100-**red**, >1000-**bold red**.

Blood ACE levels (column G) is a median for several carriers of given mutation and expressed as % of mean in population, corrected for genotype (I/D polymorphism).

**Polyphen2:** PolyPhen 2 (dbNSFP version 3.3a) annotation based on HumanVar database. This annotation should be used when evaluating rare alleles at loci potentially involved in complex phenotypes, dense mapping of regions identified by genome-wide association studies, and analysis of natural selection from sequence data. The

Table S2

| Table S2. ACE mutations                            |                      | Total: 1233                             | Blood ACE: 62                           | 9/29/2023                     |                                           |                         |        |        |
|----------------------------------------------------|----------------------|-----------------------------------------|-----------------------------------------|-------------------------------|-------------------------------------------|-------------------------|--------|--------|
| #                                                  | Genetic position     | Amino acid position<br>(mature protein) | Polymorphism<br>or ( <i>reference</i> ) | PolyPhen-2<br>Score<br>(HVAR) | Minor Allele<br>Frequency,<br>per 100 000 | Blood<br>ACE,<br>% of M |        |        |
| I. Damaging (elimination ?) of signal peptide (SP) |                      |                                         |                                         |                               |                                           |                         |        |        |
| 7                                                  | p.Ser5GlyfsX136      | SP                                      | rs797045079; (1)                        | 1.000                         | 0.4                                       | Low                     |        |        |
| 15                                                 | p.Arg8GlyfsX134      | SP                                      | (2)                                     | 1.000                         | 0.4                                       | Low                     |        |        |
| 23                                                 | p.Leu13_Leu14del     | SP                                      | rs900084108; (2)                        | 1.000                         | 6.6                                       | Low                     |        |        |
| 24                                                 | p.Leu13_Leu16del     | SP                                      | rs751352152; (3)                        | 1.000                         | 0.8                                       | Low                     |        |        |
| 32                                                 | p.Leu16_Pro23indel   | SP                                      | rs983649759; (2)                        | 1.000                         | 19                                        | Low                     |        |        |
| 36                                                 | p.Leu18_L20ins       | SP                                      | rs532691783; (4)                        | 1.000                         | 6.0                                       | 86 (4)                  |        |        |
| 41                                                 | p.Leu21Pro           | SP                                      | (2)                                     | 0.797                         | 0.4                                       | Low                     |        |        |
| II. Indels or stop codons in mature ACE            |                      |                                         |                                         |                               |                                           |                         |        |        |
| 9                                                  | p.Arg149Leufs*54     | R120LfsX54                              | rs778759606; (2,5)                      | insTTAGC                      | 4.2                                       | Low                     | AD (5) |        |
| 19                                                 | p.Arg265X            | R236X                                   | rs138873311; (2)                        |                               | 1.2                                       | Low                     |        |        |
| 20                                                 | p.Tyr266X            | Y237X                                   | rs121912704; (6,7)                      |                               | 0.8                                       | Low                     |        |        |
| 23                                                 | p.Arg274GlyfsX117    | R245Gfs                                 | (8)                                     |                               | 0.4                                       | Low                     |        |        |
| 29                                                 | p.Glu328del          | E299del                                 | (2)                                     |                               | 0.4                                       | Low                     |        |        |
| 31                                                 | p.Trp343X            | W314X                                   | rs200225958; (2,5)                      |                               | 0.8                                       | Low                     |        | AD (5) |
| 32                                                 | p.Ser346GlufsX47     | S317Efs                                 | rs1331062614; (2)                       |                               | 0.4                                       | Low                     |        |        |
| 39                                                 | p.Leu440ProfsX15     | L411Pfs                                 | rs387906576; (6)                        |                               | 0.4                                       | Low                     |        |        |
| 40                                                 | p.Asp441fs           | D412fs                                  | (5)                                     |                               | 0.4                                       | Low                     | AD (5) |        |
| 47                                                 | p.Pro485Leufs        | P456fs                                  | (9)                                     |                               | 0.4                                       | Low                     |        |        |
| 51                                                 | p.Arg496X            | R467X                                   | rs397514688; (2)                        |                               | 0.4                                       | Low                     |        |        |
| 55                                                 | p.Arg508X            | R479X                                   | rs367797185; (2)                        |                               | 3.2                                       | Low                     |        |        |
| 56                                                 | c.1709+5G>T          | Abn. splicing                           | (2)                                     |                               | 0.4                                       | Low                     |        |        |
| 62                                                 | p.Trp581Glyfs        | W552Gfs                                 | (2)                                     |                               | 0.4                                       | Low                     |        |        |
| 64                                                 | p.Lys601AsnfsX40     | K572Nfs                                 | (2,10)                                  |                               | 0.8                                       | Low                     |        |        |
| 72                                                 | p.Trp672X            | W643X                                   | (11)                                    |                               |                                           | Low                     |        |        |
| 75                                                 | p.Ile717Glnfs        | I688Qfs                                 | rs1219522144; (2)                       |                               | 0.8                                       | Low                     |        |        |
| 76                                                 | p.Ile721LysfsX60     | I692Lfs                                 | (2)                                     |                               | 0.4                                       | Low                     |        |        |
| 83                                                 | p.Arg791X            | R762X                                   | (2,10)                                  |                               | 0.4                                       | Low                     |        |        |
| 85                                                 | p.Tyr805X            | Y776X                                   | rs761458810                             |                               | 0.4                                       | 49 (personal)           |        |        |
| 94                                                 | p.Pro897fs           | P868fs                                  | (12)                                    |                               | 0.4                                       | Low                     |        |        |
| 101                                                | p.Leu1024fs          | L995fs                                  | (5)                                     |                               | 0.4                                       | Low                     |        | AD (5) |
| 103                                                | p.Leu1032fs          | L1003fs                                 | (12)                                    |                               | 0.4                                       | Low                     |        |        |
| 105                                                | p.Asp1058Tyrfs       | D1029Yfs                                | (5)                                     |                               | 0.4                                       | Low                     |        | AD (5) |
| 121                                                | p.Gln1165X           | Q1136X                                  | (2,10)                                  |                               | 0.4                                       | Low                     |        |        |
| 122                                                | p.Lys1172_Met1183del | K1143_M1154del                          | (1)                                     |                               | 0.4                                       | Low                     |        |        |
| 123                                                | c.3503+1G>A          | Abn. splicing                           | (2)                                     |                               | 0.4                                       | Low                     |        |        |

Table S2

|                                                         |                   |                     |                      |       |                  |             |                  |
|---------------------------------------------------------|-------------------|---------------------|----------------------|-------|------------------|-------------|------------------|
| 124                                                     | c.3691+1G>A       | Abn. splicing       | (13)                 |       | 4.4              | 1133        |                  |
| 125                                                     | p.Gly1174AlafsX12 | G1145Afs            | rs754265941; (2,8)   |       | 47               | Low         |                  |
| 129                                                     | p.Trp1226X        | W1197X <sup>b</sup> | rs769710002; (14)    |       | 0.4              | 1300        |                  |
| 130                                                     | p.Ser1238Pfs      | S1209Pfs            | (5)                  |       | 0.4              | Low         | AD (5)           |
| 131                                                     | p.Gln1253X        | Q1224X <sup>b</sup> | rs1174820268; (15)   |       | 0.4              | 1200        |                  |
| <b>III. All missense mutations (including damaging)</b> |                   |                     |                      |       |                  |             |                  |
| 14                                                      | p.Gly45Arg        | G16R                | rs750712925          | 0.999 | 2.9              | Low (16)    |                  |
| 181                                                     | p.Tyr244Cys       | Y215C               | rs3730025; (7,16-19) | 1.000 | 1068             | 73 (4,19)   | AD (17-18)       |
| 195                                                     | p.Arg259His       | R230H               | rs370903033; (2,9)   | 0.995 | 1.2              | Low (9)     |                  |
| 222                                                     | p.Gln288Arg       | Q259R               | rs199591851; (2,9)   | 0.998 | 74               | 68 (4)      |                  |
| 260                                                     | p.Leu333Gln       | L304Q               | rs761390621; (2)     | 1.000 | 0.7              | Low         |                  |
| 275                                                     | p.Gly354Arg       | G325R               | rs56394458; (7)      | 0.998 | 780              | 62 (4)      |                  |
| 285                                                     | p.Ser362Trp       | S333W               | rs142328237; (21)    | 1.000 | 6.8              | 71 (21)     |                  |
| 367                                                     | p.Arg459Gln       | R430Q               | (22)                 |       |                  | Low (22)    |                  |
| 379                                                     | p.Arg482Cys       | R453C               | rs201540553; (7)     | 0.649 | 19               | Low (16)    |                  |
| 384                                                     | p.Pro485Arg       | P456R               | rs28730839; (7)      | 0.301 | 48               | 98 (4)      |                  |
| 385                                                     | p.Pro485Leu       | P456L               | (9)                  |       |                  | Low (9)     |                  |
| 396                                                     | p.Tyr494Asp       | Y465D               | rs760325775; (20,23) | 0.011 | 2.4              | 700 (23)    |                  |
| 398                                                     | p.Arg496Gln       | R467Q               | rs761345398; (22,24) | 1.000 | 1.9              | Low (22)    |                  |
| 408                                                     | p.Pro505Ala       | P476A               | rs148943954; (7)     | 0.939 | 59               | 147 (4)     |                  |
| 457                                                     | p.Arg561Trp       | R532W               | rs4314; (7,20,25)    | 0.783 | 78               | 500 (25)    |                  |
| 516                                                     | p.Trp623Arg       | W594R               | (2,10)               | 1.000 | 0.4              | Low (2)     |                  |
| 524                                                     | p.Pro630Leu       | P601L               | rs142818229; (4)     | 0.988 | 4.1              | 154 (4)     |                  |
| 532                                                     | p.Gly639Ser       | G610S               | rs72845024; (4)      | 0.007 | 6.1              | 142 (4)     |                  |
| 704                                                     | p.Arg857His       | R828H               | rs146089353; (2,10)  | 1.000 | 3.2              | Low (2)     |                  |
| 890                                                     | p.Gln1098Arg      | Q1069R              | rs1568047250; (30)   | 1.000 | 1.6              | 36 (30)     |                  |
| 967                                                     | p.Arg1209Pro      | R1180P              | rs5381166970; (2,10) | 0.358 | 1.6              | 203* (10)   |                  |
| 989                                                     | p.Asn1225Lys      | N1196K              | rs1033103629; (15)   | 0.137 | 2.4              | 434 (15)    |                  |
| 994                                                     | p.Pro1228Leu      | P1199L              | rs121912703; (31)    | 1.000 | 3.7 <sup>d</sup> | 425 (14,31) |                  |
| 1025                                                    | p.Arg1279Gln      | R1250Q              | rs4980; (7, 28)      | 0.002 | 410              | 85 (4)      | AD (28, females) |
| <b>Statistics</b>                                       |                   |                     |                      |       |                  |             |                  |
|                                                         |                   |                     |                      |       |                  |             |                  |
| <b>Probably damaging (red)</b>                          |                   |                     |                      |       |                  |             |                  |
| <b>Possibly damaging (violet)</b>                       |                   |                     |                      |       |                  |             |                  |
| <b>Probably damaging and possibly damaging combined</b> |                   |                     |                      |       |                  |             |                  |
| <b>Benign</b>                                           |                   |                     |                      |       |                  |             |                  |
| <b>All (MAF)</b>                                        |                   |                     |                      |       |                  |             |                  |

Table S2

Name of the ACE mutations (column 3) , that were already confirmed as LoF, were marked with **red**.  
<sup>a</sup> Japanese; <sup>b</sup> Mutations, eliminating transmembrane anchor, i.e. increasing (>10-fold) blood ACE, and thus, decreasing tissue ACE; <sup>c</sup> mostly African; <sup>d</sup> much more frequent in Netherlands [18];  
 Frequency of mutations ( MAF, column 6): >10-**bold**, >100-**red**, >1000-**bold red**.  
 Blood ACE levels (column 7) is expressed as % of mean in population

**Polyphen2:** PolyPhen 2 (dbNSFP version 3.3a) annotation based on HumanVar database. This annotation should be used when evaluating rare alleles at loci potentially involved in complex phenotypes, dense mapping of regions identified by genome-wide association studies, and analysis of natural selection from sequence data. The annotation consists of score and categorical prediction. There are three possible predictions: **D** (**Probably damaging**, **score**≥**0.909**), **P** (**possibly damaging**, **0.446**≤**score**≤**0.908**), **B** (benign, score≤0.445).

 ACE mutations, analysed in this study  
 Blood ACE levels presented as median of blood ACE levels corrected for genotype of ACE I/D polymorphism
